1 Chimpanzee Brain Morphometry Utilizing Standardized MRI Preprocessing  
2 and Macroanatomical Annotations

3 **Author list**

4 Sam Vickery<sup>1,2</sup>, William D. Hopkins<sup>3</sup>, Chet C. Sherwood<sup>4</sup>, Steven J. Schapiro<sup>3,5</sup>, Robert  
5 D. Latzman<sup>6</sup>, Svenja Caspers<sup>7,8,9</sup>, Christian Gaser<sup>10,11</sup>, Simon B. Eickhoff<sup>1,2</sup>, Robert  
6 Dahnke<sup>10,11,12\*</sup>, Felix Hoffstaedter<sup>1,2\*</sup> (\*equal contribution)

7  
8  
9 1 Institute of Systems Neuroscience, Medical Faculty, Heinrich-Heine-University, Düsseldorf, Germany.

10  
11 2 Institute of Neuroscience and Medicine (INM-7) Research Centre Jülich, Jülich, Germany

12  
13 3 Keeling Center for Comparative Medicine and Research, The University of Texas MD Anderson Cancer  
14 Center, Bastrop, Texas

15  
16 4 Department of Anthropology and Center for the Advanced Study of Human Paleobiology, The George  
17 Washington University, Washington, DC, USA.

18  
19 5 Department of Experimental Medicine, University of Copenhagen, Copenhagen, Denmark

20  
21 6 Department of Psychology, Georgia State University, Atlanta, GA, USA

22  
23 7 Institute of Neuroscience and Medicine (INM-1), Research Centre Jülich, Jülich, Germany

24  
25 8 Institute for Anatomy I, Medical Faculty, Heinrich-Heine-University, Düsseldorf, Germany

26  
27 9 JARA-BRAIN, Jülich-Aachen Research Alliance, Jülich, Germany

28  
29 10 Structural Brain Mapping Group, Department of Neurology, Jena University Hospital, Jena, Germany

30  
31 11 Structural Brain Mapping Group, Department of Psychiatry and Psychotherapy, Jena University Hospi-  
32 tal, Jena, Germany

33  
34 12 Center of Functionally Integrative Neuroscience, Department of Clinical Medicine, Aarhus University,  
35 Denmark

36

37

38

39

40

41

## Abstract

42 Chimpanzees are among the closest living relatives to humans and, therefore, provide a  
43 crucial comparative model for investigating primate brain evolution. In recent years, hu-  
44 man brain research has strongly benefited from enhanced computational models and im-  
45 age processing pipelines that could also improve data analyses in animals by using spe-  
46 cies-specific templates. In this study, we use MRI data from the National Chimpanzee  
47 Brain Resource (NCBR) to develop the chimpanzee brain template Juna.Chimp for spatial  
48 registration and the novel macro-anatomical brain parcellation Davi130 for standardized  
49 whole-brain analysis. Additionally, we introduce a ready-to-use complete image pro-  
50 cessing pipeline built upon the CAT12 toolbox in SPM12, implementing a standard human  
51 image preprocessing framework in chimpanzees. Applying this approach to data from 178  
52 subjects, we find strong evidence for age-related GM atrophy in multiple regions of the  
53 chimpanzee brain, as well as, a human-like anterior-posterior pattern of hemispheric  
54 asymmetry in medial chimpanzee brain regions.

55

56

## Introduction

57

58

59

60

61

62

63

64

65

66

67

68

69

70

71

72

73

74

75

Chimpanzees (*Pan troglodytes*) along with bonobos (*Pan paniscus*) represent the closest extant relatives of humans sharing a common ancestor approximately 7-8 million years ago (Langergraber et al. 2012). Experimental and observational studies, in both the field and in captivity, have documented a range of cognitive abilities that are shared with humans such as tool use and manufacturing (Shumaker et al. 2011), symbolic thought (de Waal 1996), mirror self-recognition (Anderson and Gallup 2015; Hecht et al. 2017) and some basic elements of language (Savage-Rumbaugh 1986; Savage-Rumbaugh and Lewin 1994; Tomasello and Call 1997) like conceptual metaphorical mapping (Dahl and Adachi 2013). This cognitive complexity together with similar neuroanatomical features (Zilles et al. 1989; Rilling and Insel 1999; Gomez-Robles et al. 2013; Hopkins et al. 2014a, 2017) and genetic proximity (Waterson et al. 2005) renders these species unique among non-human primates to study the evolutionary origins of the human condition. In view of evolutionary neurobiology, the relatively recent divergence between humans and chimpanzees explains the striking similarities in major gyri and sulci, despite profound differences in overall brain size. Numerous studies using magnetic resonance imaging (MRI) have compared in relative brain size, shape, and gyrification in humans and chimpanzees (Zilles et al. 1989; Rilling and Insel 1999; Gomez-Robles et al. 2013; Hopkins et al. 2014b, 2017).

76

77

78

79

80

81

82

83

84

85

Previous studies of brain aging in chimpanzees have reported minimal indications of atrophy (Herndon et al. 1999; Sherwood et al. 2011; Chen et al. 2013; Autrey et al. 2014). Nevertheless, Edler and colleagues (2017) recently found that brains of older chimpanzees' exhibit both neurofibrillary tangles and amyloid plaques, the classical features of Alzheimer's disease (AD). Neurodegeneration in the aging human brain includes marked atrophy in frontal and temporal lobes and decline in glucose metabolism even in the absence of detectable amyloid beta deposition, which increases the likelihood of cognitive decline and development of AD (Jagust 2018). Given the strong association of brain atrophy and amyloid beta in humans, this phenomenon requires further investigation in chimpanzees.

86           Cortical asymmetry is a prominent feature of brain organization in many primate  
87 species (Hopkins et al. 2015) and was recently shown in humans in a large scale ENIGMA  
88 (Enhancing Neuroimaging Genetics through Meta-Analysis) study (Kong et al. 2018). For  
89 chimpanzees, various studies have reported population-level asymmetries in different  
90 parts of the brain associated with higher order cognitive functions like tool-use (Freeman  
91 et al. 2004; Hopkins et al. 2008, 2017; Hopkins and Nir 2010; Lyn et al. 2011; Bogart et  
92 al. 2012; Gilissen and Hopkins 2013) but these results are difficult to compare within and  
93 across species, due to the lack of standardized registration and parcellation techniques  
94 as found in humans.

95           To date, there is no common reference space for the chimpanzee brain available  
96 to reliably associate and quantitatively compare neuro-anatomical evidence, nor is there  
97 a standardized image processing protocol for T1-weighted brain images from chimpan-  
98 zees that matches human imaging standards. With the introduction of voxel-based mor-  
99 phometry (VBM, Ashburner and Friston 2000) and the ICBM (international consortium of  
100 brain mapping) standard human reference brain templates almost two decades ago  
101 (Mazziotta et al. 2001) MRI analyses became directly comparable and generally repro-  
102 ducible In this study we adapt state-of-the-art MRI (magnetic resonance imaging) pro-  
103 cessing methods to assess brain aging and cortical asymmetry in the chimpanzee brain.  
104 To make this possible, we rely on the largest openly available resource of chimpanzee  
105 MRI data: the *National Chimpanzee Brain Resource* (NCBR, [www.chimpanzeebrain.org](http://www.chimpanzeebrain.org)),  
106 including *in vivo* MRI images of 223 subjects from 9 to 54 years of age (Mean age = 26.9  
107  $\pm$  10.2 years). The aim of this study is the creation of a Chimpanzee template permitting  
108 automated and reproducible image registration, normalization, statistical analysis and vis-  
109 ualization to systematically investigate brain aging and hemispheric asymmetry in chim-  
110 panzees.

111

112

## Results

113

114

115

116

117

118

119

120

121

122

123

Initially, we created the population based Juna (Forschungszentrum Juelich - University Jena) T1-template, a tissue probability maps (TPM) for tissue classification and a non-linear spatial registration 'Shooting' template (Figure 1) in an iterative fashion. The preprocessing pipeline and templates creation were established using the freely available *Statistical Parametric Mapping* (SPM12 v7487, <http://www.fil.ion.ucl.ac.uk/spm/>) software and *Computational Anatomy Toolbox* (CAT12 r1434, <http://www.neuro.uni-jena.de/cat/>) and is freely available. Juna.Chimp templates and the Davi130 parcellation as well as images for analysis are available through the interactive Juna.Chimp web viewer (<http://junachimp.inm7.de/>).

124

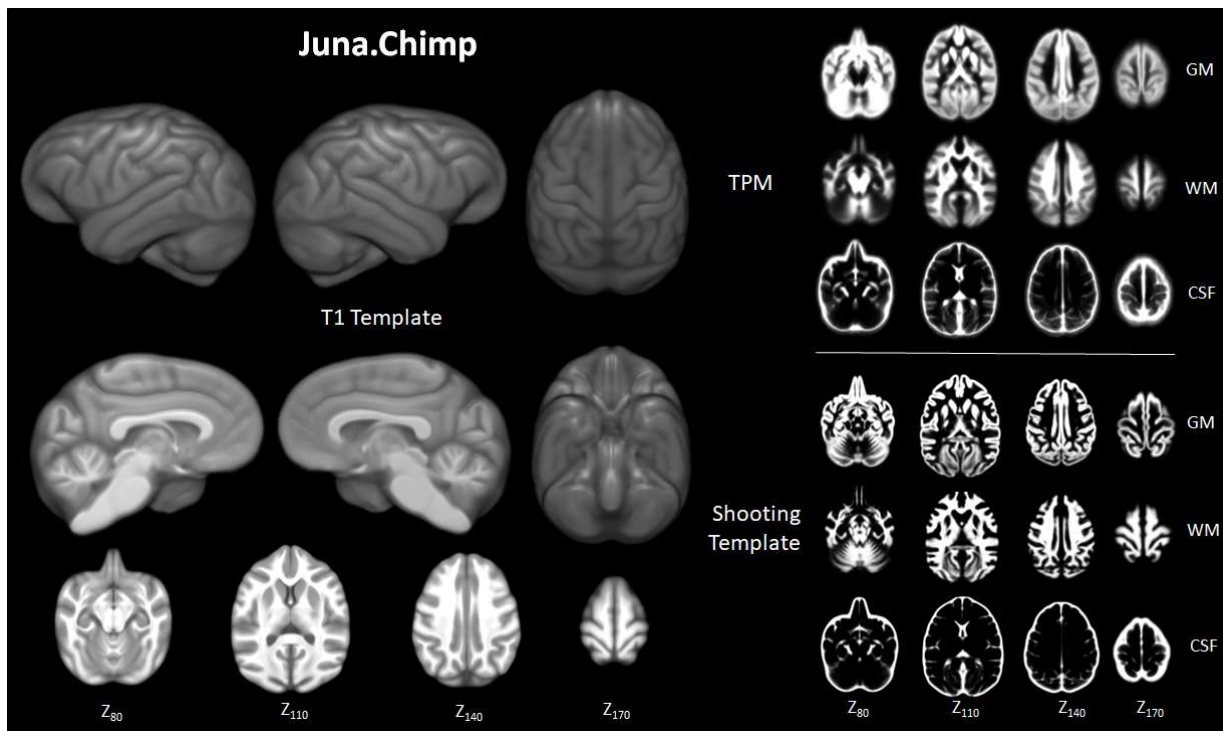

125

126

127

128

**Figure 1.** Juna.Chimp templates including the average T1- template, Geodesic Shooting template and tissue probability maps (TPM). For Shooting templates and TPM axial slices are shown of gray matter (GM), white matter (WM), and cerebrospinal fluid (CSF). All templates are presented at 0.5mm resolution.

129

130

To enable more direct comparison to previous research, we manually created the Davi130 parcellation (by R.D. and S.V.), a whole brain macroanatomical annotation



131 based on the Juna T1 template (Figure 2). The delineation of regions within the cortex  
 132 was determined by following major gyri and sulci, whereby, large regions were arbitrarily  
 133 split into two or three sub-regions of approximate equal size. This process yielded 65  
 134 regions per hemisphere for a total of 130 regions for the Davi130 macro-anatomical man-  
 135 ual parcellation (Figure 2, Supplementary Table 1).

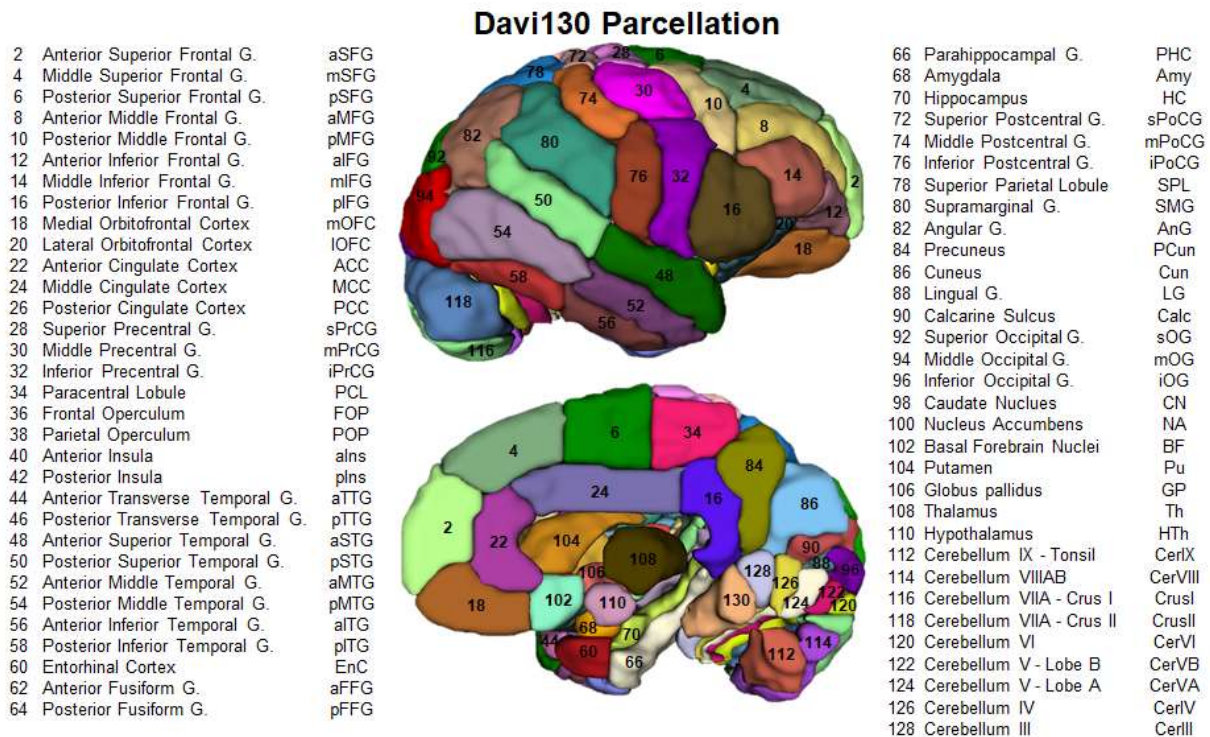

136  
 137 **Figure 2.** Lateral and medial aspect of the Davi130 parcellation right hemisphere. Visible regions  
 138 are numbered with actual Davi130 parcellation region numbers and correspond to names in the  
 139 figure. Odd numbers correspond to left hemisphere regions while even numbers are located in  
 140 the right hemisphere.

141 Following successful CAT12 preprocessing rigorous quality control (QC) was em-  
 142 ployed to identify individual MRI scans suitable for statistical analysis of brain aging and  
 143 hemispheric asymmetry in chimpanzees. Our final sample consists of 178 chimpanzees  
 144 including 120 females with an age range of 11 to 54 years and a mean age of  $26.7 \pm 9.8$   
 145 years (Figure 3A). Correlation analysis between GM fraction of total intracranial volume  
 146 and age revealed a significant negative association between the two ( $R^2 = 0.11$ ,  $p <$

147 0.0001) demonstrating age-related decline in overall GM (Figure 3B). Both male and fe-  
148 male subjects show a significant age effect on GM (male:  $R^2 = 0.08$ ,  $p = 0.03$ ; female  $R^2$   
149  $= 0.11$ ,  $p = 0.0001$ ). The linear model showed no significant sex differences of GM decline  
150 ( $p = 0.08$ ).

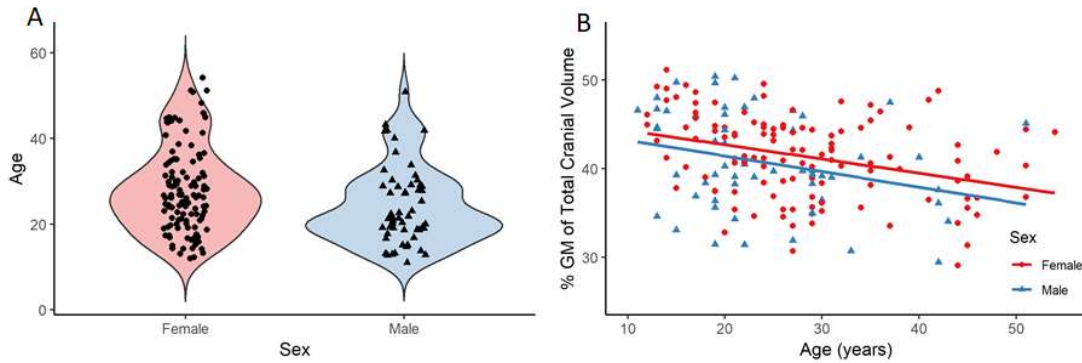

151  
152  
153 **Figure 3.** A - Distribution of age and sex in the final sample of 178 chimpanzees. B- linear rela-  
154 tionship between GM and age for female and male respectively.  
155

156 Region based morphometry analysis was applied to test for local effect of age on  
157 GM. Linear regression analyses identified 22 regions in the Davi130 parcellation across  
158 both hemispheres that were significantly associated with age after family-wise error (FWE)  
159 correction for multiple testing (Figure 4, for all region results see Supplementary). Specif-  
160 ically, GM decline with age was found bilaterally in the lateral orbitofrontal cortex (IOFC) and  
161 mid-cingulate (MCC) as well as unilaterally in the right precuneus (PCun), posterior cingulate  
162 (PCC), and lingual gyrus (LG), in addition to the left anterior transverse temporal gyrus (aTTG)  
163 and calcarine sulcus (Calc) within the cerebral cortex. The strongest association with aging  
164 was in the bilateral putamen (Pu) and caudate nucleus (CN), while the nucleus accumbens  
165 (NA) and superior cerebellum (CerIII, CerIV, CerVA, and right CrusII) also presented a sig-  
166 nificant aging effect. Finally, to test for more fine grained effects of aging, the same sample  
167 was analyzed with VBM revealing additional clusters of GM that are significantly affected  
168 by age in chimpanzees (Figure 5) after FWE correction using threshold-free cluster en-  
169 hancement (TFCE) (Smith and Nichols 2009). On top of the regions identified by region-  
170 wise morphometry, we found voxel-wise effects throughout anterior cingulate cortex  
171 (ACC), middle frontal gyrus (MFG) and in parts of the superior and inferior frontal gyrus

172 (SFG, IFG), postcentral gyrus, superior and transverse temporal gyrus (STG, TTG), an-  
173 gular gyrus (AnG), superior occipital gyrus (sOG) and in inferior parts of the cerebellum.

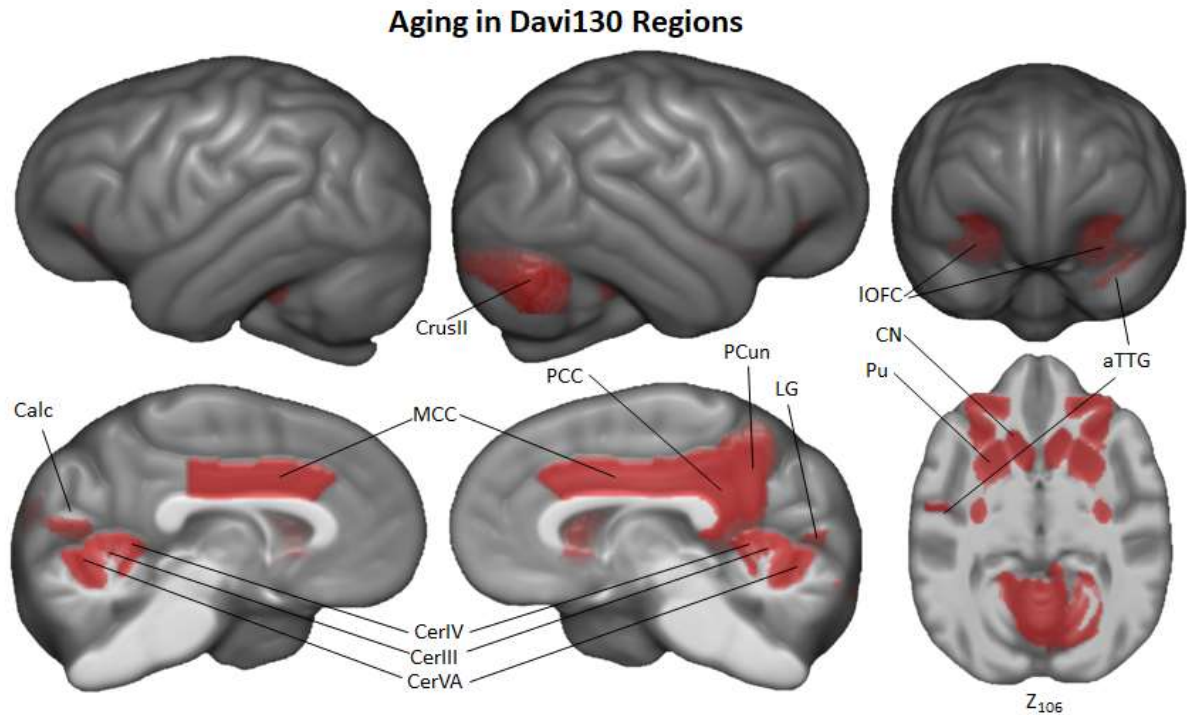

174

175 **Figure 4.** Region-wise morphometry in the Davi130 parcellation age regression where red regions  
176 represent Davi130 regions that remained significant at  $p \leq 0.05$  following FWE correction. aTTG  
177 – anterior transverse temporal gyrus, Calc – Calcarine sulcus, CrusII – cerebellum VIIA-CrusII,  
178 CerVA – cerebellum VA, CerIV – cerebellum IV, CerIII – cerebellum III, CN – caudate nucleus,  
179 IOFC – lateral orbitofrontal cortex, LG – lingual gyrus, MCC – medial cingulate cortex, PCC –  
180 posterior cingulate cortex, PCun – precuneus, Pu – putamen.



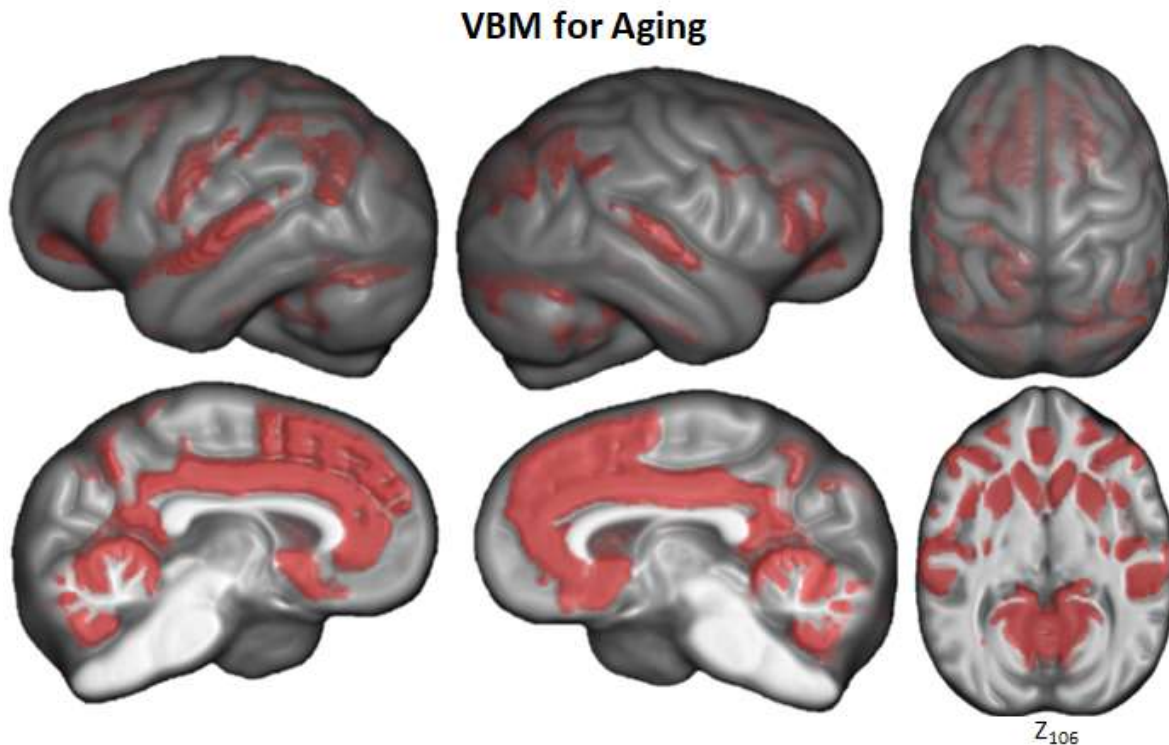

181  
182 **Figure 5.** Voxel based morphometry of aging on GM volume using TFCE with FWE correction  
183 at  $p \leq 0.05$ .  
184

185 Hemispheric asymmetry of the chimpanzee brain was assessed for each cor-  
186 tical Davi130 region with a total of 30 macro-anatomical regions exhibiting significant cor-  
187 tical asymmetry after FWE correction (Figure 6, all region asymmetry found in Supple-  
188 mentary). Slightly more regions were found with greater GM volume on the right hemi-  
189 sphere ( $n=17$ ) as compared to the left ( $n=13$ ). In the left hemisphere, we found more GM  
190 laterally in the inferior postcentral gyrus (iPoCG), supramarginal gyrus (SMG) and supe-  
191 rior occipital gyrus (sOG), insula and posterior TTG as well as medially in the orbitofrontal  
192 cortex (mOFG), basal forebrain nuclei (BF), hippocampus (HC), and anterior SFG. Right-  
193 ward cortical asymmetry was located medially in the posterior SFG, paracentral lobule  
194 (PCL), PCC, cuneus (Cun) and the area around the calcarine sulcus, in the parahippo-  
195 campal gyrus (PHC) and posterior fusiform gyrus (pFFG), as well as in the parietal oper-  
196 culum (POP). Laterally, rightward cortical asymmetry was found in the middle postcentral  
197 gyrus (mPoCG) and posterior superior temporal gyrus (pSTG). Within the basal ganglia,  
198 leftward GM asymmetry was observed in the putamen (Pu), and hypothalamus (HTh),

199 while, rightward asymmetry is in the globus pallidus (GP) and thalamus (Th). In the ante-  
200 rior cerebellar lobe, there was leftward (CerIV) and rightward (CerII) GM asymmetry. The  
201 posterior cerebellum showed only rightward (CerVI and CerIX) asymmetry.

202 The moderate pattern of asymmetry we observed medially was a shift from more  
203 anterior regions showing leftward GM asymmetry (mOFC, BF, and aSFG) while more  
204 posterior regions presented rightward asymmetry (pSFG, PCL, PCC, Cun, Calc, and LG).  
205 The lateral regions did not show a decipherable pattern.

206

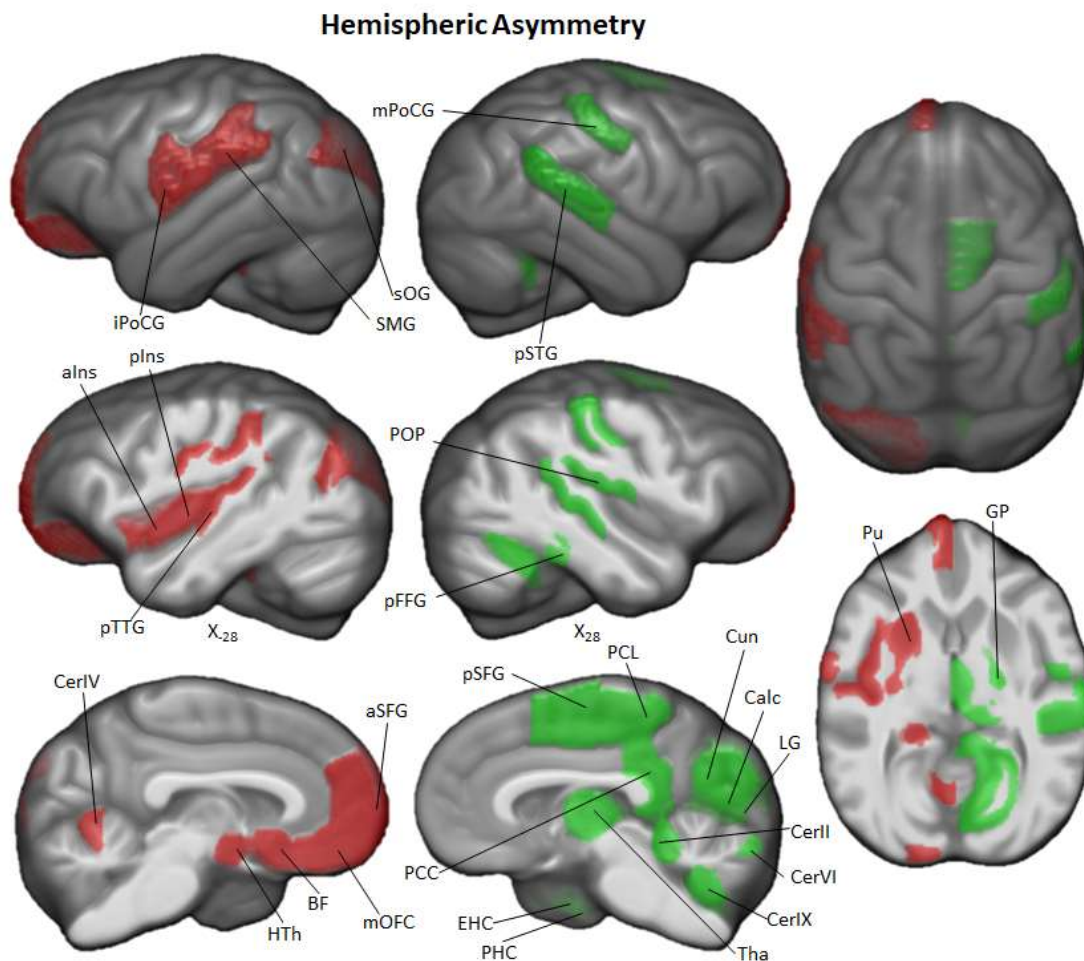

207

208 **Figure 6.** Hemispheric asymmetry of Davi130 regions within the chimpanzee sample. Significant  
209 leftward (red) and rightward (green) asymmetrical regions are those with a  $p \leq 0.05$  after FWE  
210 correction. alns – anterior insula, aSFG – anterior superior frontal gyrus, BF – basal forebrain  
211 nuclei, Calc – calcarine sulcus, CerIX – cerebellum IX, CerVI – cerebellum VI, CerIV – cerebellum

212 IV, CerII, cerebellum II, Cun – cuneus, EnC – entorhinal cortex, GP – globus pallidus, HTh –  
213 hypothalamus, iPoCG – inferior postcentral gyrus, LG – lingual gyrus, mOFC – medial orbitofron-  
214 tal cortex, mPoCG – middle postcentral gyrus, PCC – posterior cingulate cortex, PCL – paracen-  
215 tral lobule, pFFG – posterior fusiform gyrus, PHC – parahippocampal gyrus, plns – posterior in-  
216 sula, POP – parietal operculum, pSFG – posterior superior frontal gyrus, pSTG – posterior supe-  
217 rior temporal gyrus, pTTG – posterior transverse temporal gyrus, Pu – putamen, SMG – supra-  
218 marginal gyrus, sOG – superior occipital gyrus, Th – thalamus. The hippocampus (HC) is signifi-  
219 cantly leftward lateralized but is not shown in this figure.

220

221

## Discussion

222 As a common reference space for the analysis of chimpanzee brain data, we cre-  
223 ated the Juna.Chimp template, constructed from a large heterogeneous sample of T1-  
224 weighted MRI's from the NCBR. The Juna.Chimp template includes a reference T1-tem-  
225 plate, along with probability maps of brain and head tissues accompanied by a Geodesic  
226 Shooting template for the publicly available SPM12/CAT12 preprocessing pipeline to ef-  
227 ficiently segment and spatially normalize individual chimpanzee T1 images. The T1-tem-  
228 plate and TPM can be also used as the target for image registration with other popular  
229 software packages, such as FSL (<https://fsl.fmrib.ox.ac.uk/fsl>) or ANTs  
230 (<http://stnava.github.io/ANTs/>).

231 Additionally, we provide the manually segmented, macroanatomical Davi130  
232 whole-brain parcellation comprising 130 cortical, sub-cortical and cerebellar brain regions,  
233 which enables systematical extraction of volumes-of-interest from chimpanzee MRI data.  
234 The image processing pipeline and Davi130 parcellation were used to investigate ageing  
235 and interhemispheric asymmetry in the chimpanzee brain. Our analyses demonstrated  
236 strong age-related GM atrophy as well as marked hemispheric asymmetry over the whole  
237 cortex.

238 We found clear evidence of global and local GM decline in the aging chimpanzee  
239 brain even though previous research into age-related changes in chimpanzee brain or-  
240 ganization has shown little to no effect (Herndon et al. 1999; Sherwood et al. 2011; Chen  
241 et al. 2013; Autrey et al. 2014). This can be attributed on the one hand to the larger num-

242 ber of MRI scans available via the NCBR including 30% of older subjects with 55 individ-  
243 uals over 30 and 12 over 45 years of age, which is crucial for modelling the effect of aging  
244 (Chen et al. 2013; Autrey et al. 2014). On the other hand, state-of-the-art image pro-  
245 cessing enabled the creation of the species specific Juna.Chimp templates, which largely  
246 improves tissue segmentation and registration accuracy (Ashburner and Friston 2000).  
247 Non-linear registration was also improved by the large heterogeneous sample utilized for  
248 the creation of the templates encompassing a representative amount of inter-individual  
249 variation. We used the well-established structural brain imaging toolbox CAT12 to build a  
250 reusable chimpanzee preprocessing pipeline catered towards analyzing local tissue-spe-  
251 cific anatomical variations as measured with T1 weighted MRI. The Davi130-based re-  
252 gion-wise and the voxel-wise morphometry analysis consistently showed localized GM  
253 decline in IOFC, the basal ganglia, MCC, PCC, PCun and superior cerebellum. The VBM  
254 approach additionally produced evidence for age effects in bilateral prefrontal cortex,  
255 ACC, superior temporal regions and throughout the cerebellum. These additional effects  
256 can be expected, as VBM is more sensitive to GM changes due to aging (Kennedy et al.  
257 2009). The brain regions revealing GM decline in both approaches in particular medial  
258 and temporal cortical regions and the basal ganglia have also been shown to exhibit GM  
259 atrophy during healthy aging in humans (Good et al. 2001b; Kennedy et al. 2009; Crivello  
260 et al. 2014; Minkova et al. 2017).

261 Very recently, it has been shown that stress hormone levels increase with age in  
262 chimpanzees, a process previously thought to only occur in humans which can cause GM  
263 volume decline (Emery Thompson et al. 2020). This further strengthens the argument that  
264 age-related GM decline is also shared by humans closest relative, the chimpanzee. Fur-  
265 thermore, Edler et al. (2017) found Alzheimer's disease-like accumulation of amyloid beta  
266 plaques and neurofibrillary tangles located predominantly in prefrontal and temporal cor-  
267 tices in a sample of elderly chimpanzees between 37 and 62 years of age. As the aggre-  
268 gation of these proteins is associated with localized neuronal loss and cortical atrophy in  
269 humans (La Joie et al. 2012; Llado et al. 2018), the age-related decline in GM volume  
270 shown here is well in line with the findings by Jagust (2016) associating GM atrophy with  
271 amyloid beta. These findings provide a biological mechanism for accelerated GM de-  
272 crease in prefrontal, limbic, and temporal cortices in chimpanzees. In contrast, elderly

273 rhesus monkeys show GM volume decline without the presence of neurofibrillary tangles  
274 (Alexander et al. 2008; Shamy et al. 2011). Taken together, regionally specific GM atro-  
275 phy seems to be a common aspect of the primate brain aging pattern observed in ma-  
276 caque monkeys, chimpanzees and humans. Yet, to make a case for the existence of  
277 Alzheimer's disease in chimpanzees, validated cognitive tests for Alzheimer's-like cogni-  
278 tive decline in non-human primates are needed, to test for direct associations between  
279 cognitive decline with tau pathology and brain atrophy.

280 Hemispheric asymmetry was found in almost two-thirds of all regions of the  
281 Davi130 parcellation, reproducing several regional findings reported in previous studies  
282 using diverse image processing methods as well as uncovering numerous novel popula-  
283 tion-level asymmetries. Previous studies utilizing a region-wise approach based on hand-  
284 drawn or atlas derived regions also reported leftward asymmetry of PT volume (Lyn et al.  
285 2011; Gilissen and Hopkins 2013), and of cortical thickness in STG (Hopkins and Avants  
286 2013), and the insula (Hopkins et al. 2017). Region-wise morphometry also demonstrated  
287 rightward asymmetry in thickness of the PCL and PHC (Hopkins et al. 2017). Previous  
288 VBM findings also revealed leftward asymmetry in the anterior SFG and SMG along with  
289 rightward lateralization at the posterior SFG, and middle part of the PoCG (Hopkins et al.  
290 2008). In the current study, new regions of larger GM volume on the left were found in  
291 frontal (mSFG, mOFC), limbic (HC), temporal (aTTG), and parietal (iPoCG) cortices as  
292 well as in the basal ganglia (BF, Pu, HTh) and cerebellum (CerIV). Novel rightward asym-  
293 metries could also be seen in temporal (pFFG), limbic (PCC, EnG), parietal (POP), and  
294 occipital (Cun, LG, Calc) cortices besides the basal ganglia (Th, GP) and the cerebellum  
295 (CerIX, CerVI, CerII).

296 Significant leftward asymmetries in Davi130s' region pTTG which contains the PT,  
297 is consistent with previous studies in GM volume of the PT, its surface area (Hopkins and  
298 Nir 2010), and cytoarchitecture (Zilles et al. 1996; Gannon et al. 1998; Spocter et al. 2010).  
299 At this cortical location, old world monkeys lack the morphological features of the PT,  
300 nevertheless several species have been shown to display asymmetry in Sylvian fissure  
301 length (Lyn et al. 2011; Marie et al. 2018).

302 Interestingly, the parietal operculum showed rightward asymmetry, while Gilissen  
303 and Hopkins (2013) showed that the left parietal operculum was significantly longer in



304 chimpanzees, compared to the right. The left lateral sulcus in the Juna.Chimp template  
305 proceeds further posteriorly and superiorly compared to the right, confirming this finding,  
306 even though we found greater GM volume in the right POP as compared to the left.

307 Population-level asymmetries in the pIFG in chimpanzees were documented al-  
308 most two decades ago by Cantalupo and Hopkins (2001), who reported a leftward asym-  
309 metry in pIFG volume in a small sample of great apes. In subsequent studies this result  
310 could not be replicated when considering GM volume (Hopkins et al. 2008; Keller et al.  
311 2009) or cytoarchitecture (Schenker et al. 2010). We also failed to find a leftward asym-  
312 metry in GM volume for the pIFG, in contrary to asymmetries found in humans (Amunts  
313 et al. 1999; Uylings et al. 2006; Keller et al. 2009). The prominent leftward PT asymmetry  
314 in chimpanzees is also a well-documented population-level asymmetry in humans (Good  
315 et al. 2001a; Watkins 2001). The overall regional distribution of asymmetry in chimpan-  
316 zees is partially similar to that found in human cortical organization (Good et al. 2001a;  
317 Luders et al. 2006; Zhou et al. 2013; Koelkebeck et al. 2014; Plessen et al. 2014; Chiarello  
318 et al. 2016; Maingault et al. 2016; Kong et al. 2018).

319 Gross hemispheric asymmetry in humans follows a general structure of frontal  
320 rightward and occipital leftward asymmetry known as the ‘Yakovlevian torque’. This refers  
321 to the bending of the anterior right hemisphere over the midline into the left and the pos-  
322 terior left hemisphere bending over to the right and is represented as differences in widths  
323 of frontal and occipital lobes (Toga and Thompson 2003). This organizational trait was  
324 apparent in the Juna.Chimp templates with a slight frontal and occipital bending, which  
325 was manually adapted when labelling the medial Davi130 regions. The higher leftward  
326 GM density in frontal regions and rightward asymmetry in occipital regions may also show  
327 this trend. Of note, this organizational pattern of asymmetry was less apparent in lateral  
328 cortical structures, however medially, this anterior-posterior asymmetry is evident in chim-  
329 panzees, challenging recent findings from Li and colleagues (2018) who rejected the ‘Ya-  
330 kovlevian torque’ in chimpanzees. Specifically, leftward asymmetry of the frontal regions  
331 aSFG, BF, and mOFC and the rightward asymmetry of posterior regions pSFG, PCL,  
332 PCC, Cun, Calc, and LG aligns with the pattern of asymmetry reported in human cortical  
333 GM volume, thickness and surface area (Luders et al. 2006; Zhou et al. 2013; Plessen et  
334 al. 2014; Chiarello et al. 2016; Kong et al. 2018).

335           The NCBR offers the largest and richest openly available dataset of chimpanzee  
336 brain MRI scans acquired over a decade with 1.5T and 3T MRI at two locations, capturing  
337 valuable inter-individual variation in one large heterogeneous sample. To account for the  
338 scanner effect on GM estimation, field strength was modelled as a covariate of no interest  
339 for analyzing the age effect on GM volume. Rearing has been shown to affect GM struc-  
340 tural covariance networks and cortical organization (Bogart et al. 2014; Bard and Hopkins  
341 2018) while handedness has been shown to correlate with asymmetry in the motor cortex  
342 (Hopkins and Cantalupo 2004) and the volume of IFG (Tagliatela et al. 2006) as well as  
343 with gyrification asymmetry (Hopkins et al. 2007). Therefore, these covariates may also  
344 modulate hemispheric asymmetry and/or age-related GM volume decline here, but as  
345 these data were not available for all subjects, we did not consider these effects in order  
346 to include as much MRI data as possible to model effects of age. The focus of this study  
347 was the volumetric analysis of GM volume, even though the CAT12 image processing  
348 pipeline includes surface projection and analysis. Consequently, the next step will be the  
349 application of CAT12 to analyze cortical surface area, curvature, gyrification, and thick-  
350 ness of the chimpanzee brain, to include behavioral data and the quantitative comparison  
351 to humans and other species, as cortical surface projection permits a direct inter-species  
352 comparison due to cross species registration.

353

354

### **Conclusion**

355           In conclusion, we have created the new chimpanzee reference template  
356 Juna.Chimp, TPMs and the CAT12 preprocessing pipeline which is ready-to-use by the  
357 wider neuroimaging community. Investigations of an age-related GM changes in chim-  
358 panzees using both region-wise and voxel-based morphometry, showed a substantial age  
359 effect, providing further evidence for a human like physiological aging process in chim-  
360 panzees. Examining population based cortical asymmetry in chimpanzees found further  
361 evidence for the well-documented lateralization of PT. Additionally, an anterior-posterior  
362 left-right pattern of asymmetry as observed in humans was found predominantly in medial  
363 regions of the chimpanzee cortex.

364

365

## Materials and Methods

### 366 Subject Information and Image Collection Procedure

367 This study analyzed structural T1-weighted MRI scans of 223 chimpanzees (137  
368 females; 9 - 54 y/o, mean age  $26.9 \pm 10.2$  years) from the NCBR ([www.chimpanzee-](http://www.chimpanzee-brain.org)  
369 [brain.org](http://www.chimpanzee-brain.org)). The chimpanzees were housed at two locations including, the *National Center*  
370 *for Chimpanzee Care of The University of Texas MD Anderson Cancer Center* (UT-  
371 MDACC) and the *Yerkes National Primate Research Center* (YNPRC) of Emory Univer-  
372 sity. The standard MR imaging procedures for chimpanzees at the YNPRC and UT-  
373 MDACC are designed to minimize stress for the subjects. For an in-depth explanation of  
374 the imaging procedure please refer to Autrey et al. (2014). Seventy-six chimpanzees were  
375 scanned with a Siemens Trio 3 Tesla scanner (Siemens Medical Solutions USA, Inc.,  
376 Malvern, Pennsylvania, USA). Most T1-weighted images were collected using a three-  
377 dimensional gradient echo sequence with  $0.6 \times 0.6 \times 0.6$  resolution (pulse repetition =  
378 2300 ms, echo time = 4.4 ms, number of signals averaged = 3). The remaining 147 chim-  
379 panzees were scanned using a 1.5T GE echo-speed Horizon LX MR scanner (GE Medi-  
380 cal Systems, Milwaukee, WI), predominantly applying gradient echo sequence with  $0.7 \times$   
381  $0.7 \times 1.2$  resolution (pulse repetition = 19.0 ms, echo time = 8.5 ms, number of signals  
382 averaged = 8).

### 383 Creation of Chimpanzee Templates

384 An iterative process as by Franke et al. (2017) was employed to create the  
385 Juna.Chimp template, with T1 average, Shooting registration template (Ashburner and  
386 Friston 2011), as well as the TPM (Figure 7). Initially, a first-generation template was  
387 produced using the “greater\_ape” template delivered by CAT (Dahnke and Gaser 2017)  
388 that utilizes data provided in Rilling and Insel (1999). The final segmentation takes the  
389 bias-corrected, intensity-normalized, and skull-stripped image together with the initial  
390 SPM-segmentation to conduct an Adaptive Maximum A Posterior (AMAP) estimation  
391 (Rajapakse et al. 1997) with partial volume model for sub-voxel accuracy (Tohka et al.  
392 2004). The affine normalized tissue segments of GM, WM, and CSF were used to create

393 a new Shooting template that consists of four major non-linear normalization steps allow-  
394 ing to normalize new scans. To create a chimpanzee-specific TPM, we average the dif-  
395 ferent Shooting template steps to benefit from the high spatial resolution of the final Shoot-  
396 ing steps but also include the general affine aspects to avoid over-optimization. Besides  
397 the brain tissues the TPM also included two head tissues (bones and muscles) and a  
398 background class for standard SPM12 (Ashburner and Friston 2005) and CAT12 preprocess-  
399 ing. The internal CAT atlas was written for each subject and mapped to the new  
400 chimpanzee template using the information from the Shooting registration. The CAT atlas  
401 maps were averaged by a median filter and finally manually corrected. This initial template  
402 was then used in the next iteration to establish the final chimpanzee-specific Juna.Chimp  
403 template, which was imported into the standard CAT12 preprocessing pipeline to create  
404 the final data used for the aging and asymmetry analyses.

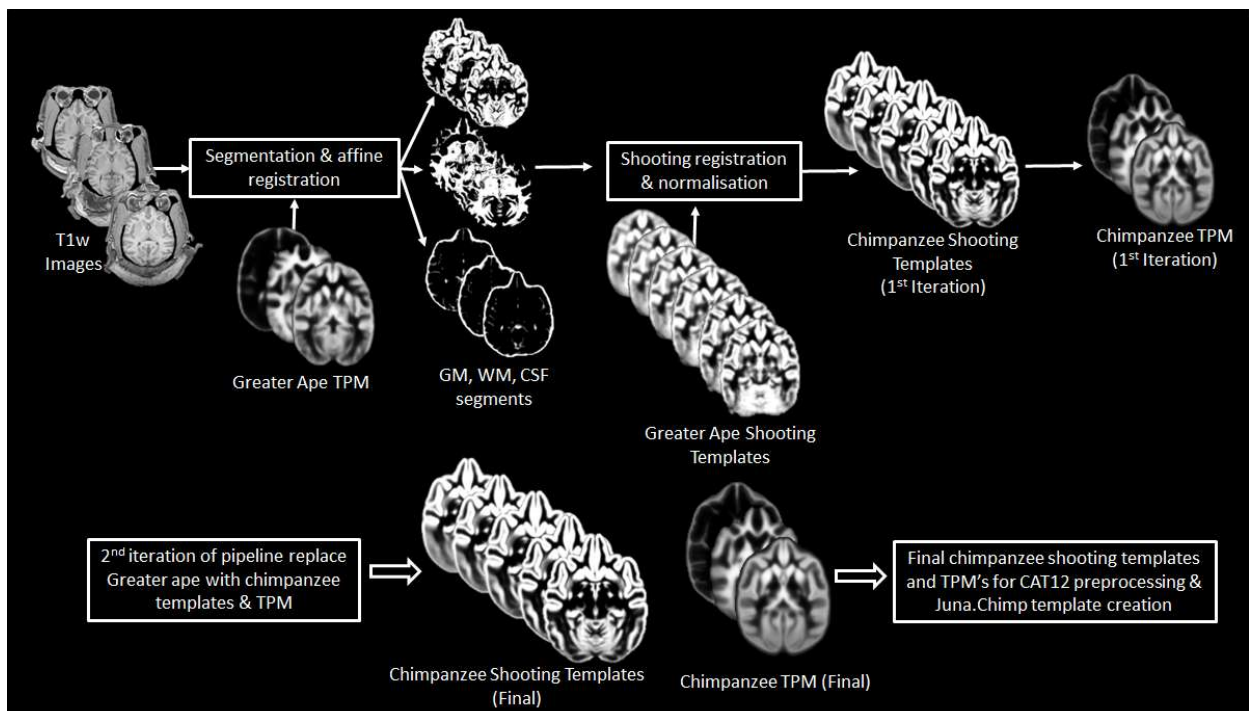

405  
406 **Figure 7.** Workflow for creation of chimpanzee specific Shooting template and TPM, which can  
407 then be used in CAT12 structural preprocessing pipeline to create the Juna.Chimp template.  
408

409 The resulting chimpanzee-Shooting template, TPM and CAT atlas establishes the robust  
410 and reliable base to segment and spatially normalize the T1-weighted images utilizing  
411 CAT12's processing pipeline (Dahnke and Gaser 2017).

412 Davi130 parcellation

413           The T1 and final Shooting template were used for a manual delineation of macro-  
414 anatomical GM structures. Identification and annotation of major brain regions were per-  
415 formed manually using the program, 3D Slicer 4.10.1 (<https://www.slicer.org>). The label-  
416 ing enables automated, region-based analysis of the entire chimpanzee brain and allows  
417 for robust statistical analysis with unmatched generalizability and interpretability. Nomen-  
418 clature and location of regions were ascertained by consulting both chimpanzee and hu-  
419 man brain atlases (Bailey P, Bonin GV 1950; Mai et al. 2015). The labelling was com-  
420 pleted by two authors (S.V. & R.D.) and reviewed by two experts of chimpanzee brain  
421 anatomy (C.C.S. & W.D.H.).

422           A total of 65 GM structures within the cerebrum and cerebellum of the left hemi-  
423 sphere were annotated and then flipped to the right hemisphere. The flipped annotations  
424 were then manually adapted to the morphology of the right hemisphere to have complete  
425 coverage of the chimpanzee brain with 130 labels. The slight bending of the anterior part  
426 of the right hemisphere and the posterior part of the left hemisphere over the midline  
427 observed in our template and annotated within our Davi130 labelling, does not align with  
428 previous findings claiming that this morphological trait is specific to the human brain (Li  
429 et al. 2018; Xiang et al. 2019).

430           The location of macroscopic brain regions was determined based on major gyri of  
431 the cerebral cortex, as well as distinct anatomical landmarks of the cerebellar cortex, and  
432 basal ganglia. Of note, the border between two gyri was arbitrarily set as the mid-point of  
433 the connecting sulcus, even though histological studies show that micro-anatomical bor-  
434 ders between brain regions are rarely situated at the fundus (Sherwood et al. 2003;  
435 Schenker et al. 2010; Spocter et al. 2010; Amunts and Zilles 2015). Large gyri were fur-  
436 ther subdivided into two or three parts based on their size and structural features, such  
437 as sulcal fundi and gyral peaks, to enable greater spatial resolution and better inter-re-  
438 gional comparison. Naming of subdivisions was based entirely on spatial location, e.g.,  
439 anterior, middle, posterior, and do not claim to correspond to functional parcellations.



#### 440 Quality Control

441 Rigorous QC was employed on all images using two iterative steps. The first step  
442 utilized the built-in CAT12 quality assurance and ‘check sample homogeneity’ function.  
443 The modulated GM maps were initially tested for sample in-homogeneity for each scanner  
444 strength separately (1.5T and 3T). The images that passed the first QC step went through  
445 a final round of sample inhomogeneity as a whole sample to finally arrive at our study  
446 sample, which included 178 chimpanzees (120 females, 11 – 54 years old, mean = 26.7  
447  $\pm$  9.8). A more in-depth explanation of the QC procedure can be found in Supplementary  
448 1.2.

#### 449 Age-Related Changes in Total Gray Matter

450 A linear regression model was used to determine the effect of aging on total GM  
451 volume. Firstly, total GM volume for each subject was converted into a percentage of total  
452 intracranial volume (TIV) to account for the variation in head size. This was then entered  
453 into a linear regression model as the dependent variable with age and sex as the inde-  
454 pendants. Sex-specific models were conducted with males and females separately using  
455 age as the only dependent variable. The slope of each regression line was determined  
456 using  $R^2$  and a p-value of  $p \leq 0.05$  was used to determine the significant effect of age and  
457 sex on total GM volume.

458

#### 459 Age-Related Changes in Gray Matter Using Davi130 Parcellation

460 The newly established Davi130 annotation was applied to the modulated GM maps  
461 to conduct region-wise morphometry analysis. First, the Davi130 regions were masked  
462 with a 0.1 GM mask to remove all non-GM portions of the regions. Subsequently, the  
463 average GM intensity of each region for all QC-passed chimpanzees was calculated. A  
464 multiple regression model was conducted for the labels from both hemispheres, whereby,  
465 the dependent variable was GM volume and the predictor variables were age, sex, TIV,  
466 and scanner. Significant age-related GM decline was established for a Davi130 label with  
467 a  $p \leq 0.05$ , after correcting for multiple comparisons using FWE (Holm 1979).

## 468 Voxel-Based Morphometry

469 VBM analysis was conducted using CAT12 to determine the effect of aging on  
470 local GM volume. The modulated and spatially normalized GM segments from each sub-  
471 ject were spatially smoothed with a 4 mm FWHM (full width half maximum) kernel prior to  
472 analyses. To restrict the overall volume of interest, an implicit 0.4 GM mask was employed.  
473 As MRI field strength is known to influence image quality, and consequently, tissue clas-  
474 sification, we included scanner strength in our VBM model as a covariate. The dependent  
475 variable in the model was age, with covariates of TIV, sex, and scanner. The VBM model  
476 was corrected using TFCE with 5000 permutations (Smith and Nichols 2009). Significant  
477 clusters were determined at  $p \leq 0.05$ , after correcting for multiple comparisons using FWE.

478

479

## 480 Hemispheric Asymmetry

481 The same as for the Davi130 age regression analysis, all labels were masked with  
482 a 0.1 GM mask to remove all non-GM portions within the regions. Cortical hemispheric  
483 asymmetry of Davi130 labels was conducted on the same QC controlled sample as used  
484 for the aging analysis and determined using the formula  $Asym = (L - R) / (L + R) * 0.5$   
485 (Kurth et al. 2015; Hopkins et al. 2017), whereby L and R represent the average GM  
486 volume for the Davi130 label region in the left and right hemisphere, respectively. There-  
487 fore, the bi-hemispheric Davi130 labels were converted into single *Asym* labels (n=65)  
488 with positive *Asym* values indicating a leftward asymmetry, and negative values, a right-  
489 ward bias. One-sample *t*-tests were conducted for each cortical *Asym* label under the null  
490 hypothesis of  $Asym = 0$ , and significant leftward or rightward asymmetry was determined  
491 with a  $p \leq 0.05$ , after correcting for multiple comparisons using FWE (Holm 1979).

492

493

## **Acknowledgements**

494 We would like to thank Jona Fischer for the creation of the interactive Juna.Chimp web  
495 viewer adapted from nehuba (github). This study was supported by the European Union's Horizon  
496 2020 Research and Innovation Program under Grant Agreement No. 785907 (HBP SGA2).

497

498

499

## References

- 500 Alexander GE, Chen K, Aschenbrenner M, Merkley TL, Santerre-Lemmon LE, Shamy  
501 JL, Skaggs WE, Buonocore MH, Rapp PR, Barnes CA. 2008. Age-related regional  
502 network of magnetic resonance imaging gray matter in the rhesus macaque. *J Neu-*  
503 *rosci.* 28:2710–2718.
- 504 Amunts K, Zilles K. 2015. Architectonic Mapping of the Human Brain beyond Brodmann.  
505 *Neuron.*
- 506 Anderson JR, Gallup GG. 2015. Mirror self-recognition: a review and critique of at-  
507 tempts to promote and engineer self-recognition in primates. *Primates.* 56:317–  
508 326.
- 509 Ashburner J, Friston KJ. 2005. Unified segmentation. *Neuroimage.* 26:839–851.
- 510 Ashburner J, Friston KJ. 2011. Diffeomorphic registration using geodesic shooting and  
511 Gauss–Newton optimisation. *Neuroimage.* 55:954–967.
- 512 Autrey MM, Reamer LA, Mareno MC, Sherwood CC, Herndon JG, Preuss T, Schapiro  
513 SJ, Hopkins WD. 2014. Age-related effects in the neocortical organization of chim-  
514 panzees: gray and white matter volume, cortical thickness, and gyrification. *Neu-*  
515 *roimage.* 101:59–67.
- 516 Bailey P, Bonin GV MW. 1950. The isocortex of the chimpanzee. Urbana, IL: Univ of Illi-  
517 nois Press.
- 518 Bard KA, Hopkins WD. 2018. Early Socioemotional Intervention Mediates Long-Term  
519 Effects of Atypical Rearing on Structural Covariation in Gray Matter in Adult Chim-  
520 panzees. *Psychol Sci.* 29:594–603.
- 521 Bogart SL, Bennett AJ, Schapiro SJ, Reamer LA, Hopkins WD. 2014. Different early  
522 rearing experiences have long term effects on cortical organization in captive chim-  
523 panzees (*Pan troglodytes*). *Dev Sci.* 17:161–174.
- 524 Bogart SL, Mangin JF, Schapiro SJ, Reamer L, Bennett AJ, Pierre PJ, Hopkins WD.  
525 2012. Cortical sulci asymmetries in chimpanzees and macaques: A new look at an  
526 old idea. *Neuroimage.* 61:533–541.
- 527 Chen X, Errangi B, Li L, Glasser MF, Westlye LT, Fjell AM, Walhovd KB, Hu X, Herndon  
528 JG, Preuss TM, Rilling JK. 2013. Brain aging in humans, chimpanzees (*Pan troglo-*

- 529 dytes), and rhesus macaques (*Macaca mulatta*): magnetic resonance imaging stud-  
530 ies of macro- and microstructural changes. *Neurobiol Aging*. 34:2248–2260.
- 531 Chiarello C, Vazquez D, Felton A, McDowell A. 2016. Structural asymmetry of the hu-  
532 man cerebral cortex: Regional and between-subject variability of surface area, cor-  
533 tical thickness, and local gyrification. *Neuropsychologia*. 93:365–379.
- 534 Crivello F, Tzourio-Mazoyer N, Tzourio C, Mazoyer B. 2014. Longitudinal assessment of  
535 global and regional rate of grey matter atrophy in 1,172 healthy older adults: Modu-  
536 lation by sex and age. *PLoS One*. 9.
- 537 Dahnke R, Gaser C. 2017. Voxel-based Preprocessing in CAT. *Organ Hum Brain*  
538 *Mapp*.
- 539 Edler MK, Sherwood CC, Meindl RS, Hopkins WD, Ely JJ, Erwin JM, Mufson EJ, Hof  
540 PR, Raghanti MA. 2017. Aged chimpanzees exhibit pathologic hallmarks of Alz-  
541 heimer’s disease. *Neurobiol Aging*. 59:107–120.
- 542 Franke K, Clarke GD, Dahnke R, Gaser C, Kuo AH, Li C, Schwab M, Nathanielsz PW.  
543 2017. Premature Brain Aging in Baboons Resulting from Moderate Fetal Undernu-  
544 trition. *Front Aging Neurosci*. 9:92.
- 545 Freeman HD, Cantalupo C, Hopkins WD. 2004. Asymmetries in the hippocampus and  
546 amygdala of chimpanzees (*Pan troglodytes*). *Behav Neurosci*. 118:1460–1465.
- 547 Gannon PJ, Holloway RL, Broadfield DC, Braun AR. 1998. Asymmetry of chimpanzee  
548 *planum temporale*: Humanlike pattern of Wernicke’s brain language area homolog.  
549 *Science (80- )*. 279:220–222.
- 550 Gilissen EP, Hopkins WD. 2013. Asymmetries of the parietal operculum in chimpanzees  
551 (*Pan troglodytes*) in relation to handedness for tool use. *Cereb Cortex*. 23:411–422.
- 552 Gomez-Robles A, Hopkins WD, Schapiro SJ, Sherwood CC. 2016. The heritability of  
553 chimpanzee and human brain asymmetry. *Proc Biol Sci*. 283.
- 554 Gomez-Robles A, Hopkins WD, Sherwood CC. 2013. Increased morphological asym-  
555 metry, evolvability and plasticity in human brain evolution. *Proc Biol Sci*.  
556 280:20130575.
- 557 Good CD, Johnsrude I, Ashburner J, Henson RNA, Friston KJ, Frackowiak RSJ. 2001a.  
558 Cerebral asymmetry and the effects of sex and handedness on brain structure: A

- 559 voxel-based morphometric analysis of 465 normal adult human brains. *Neu-*  
560 *roimage*. 14:685–700.
- 561 Good CD, Johnsrude IS, Ashburner J, Henson RN, Friston KJ, Frackowiak RS. 2001b.  
562 A voxel-based morphometric study of ageing in 465 normal adult human brains.  
563 *Neuroimage*. 14:21–36.
- 564 Hecht EE, Mahovetz LM, Preuss TM, Hopkins WD. 2017. A neuroanatomical predictor  
565 of mirror self-recognition in chimpanzees. *Soc Cogn Affect Neurosci*. 12:37–48.
- 566 Herndon JG, Tigges J, Anderson DC, Klumpp SA, McClure HM. 1999. Brain weight  
567 throughout the life span of the chimpanzee. *J Comp Neurol*. 409:567–572.
- 568 Hopkins WD, Avants BB. 2013. Regional and hemispheric variation in cortical thickness  
569 in chimpanzees (*Pan troglodytes*). *J Neurosci*. 33:5241–5248.
- 570 Hopkins WD, Li X, Crow T, Roberts N. 2017. Vertex- and atlas-based comparisons in  
571 measures of cortical thickness, gyrification and white matter volume between hu-  
572 mans and chimpanzees. *Brain Struct Funct*. 222:229–245.
- 573 Hopkins WD, Meguerditchian A, Coulon O, Bogart S, Mangin JF, Sherwood CC,  
574 Grabowski MW, Bennett AJ, Pierre PJ, Fears S, Woods R, Hof PR, Vauclair J.  
575 2014. Evolution of the Central Sulcus Morphology in Primates. *Brain Behav Evol*.  
576 84:19–30.
- 577 Hopkins WD, Meguerditchian A, Coulon O, Misiura M, Pope S, Mareno MC, Schapiro  
578 SJ. 2017. Motor skill for tool-use is associated with asymmetries in Broca’s area  
579 and the motor hand area of the precentral gyrus in chimpanzees (*Pan troglodytes*).  
580 *Behav Brain Res*. 318:71–81.
- 581 Hopkins WD, Misiura M, Pope SM, Latash EM. 2015. Behavioral and brain asymmetries  
582 in primates: A preliminary evaluation of two evolutionary hypotheses. *Ann N Y Acad*  
583 *Sci*. 1359:65–83.
- 584 Hopkins WD, Nir TM. 2010. Planum temporale surface area and grey matter asymme-  
585 tries in chimpanzees (*Pan troglodytes*): The effect of handedness and comparison  
586 with findings in humans. *Behav Brain Res*. 208:436–443.
- 587 Hopkins WD, Tagliabue JP, Meguerditchian A, Nir T, Schenker NM, Sherwood CC.  
588 2008. Gray matter asymmetries in chimpanzees as revealed by voxel-based mor-  
589 phometry. *Neuroimage*. 42:491–497.



- 590 Keller SS, Roberts N, Hopkins W. 2009. A Comparative Magnetic Resonance Imaging  
591 Study of the Anatomy, Variability, and Asymmetry of Broca's Area in the Human  
592 and Chimpanzee Brain. *J Neurosci.* 29:14607–14616.
- 593 Kennedy KM, Erickson KI, Rodrigue KM, Voss MW, Colcombe SJ, Kramer AF, Acker  
594 JD, Raz N. 2009. Age-related differences in regional brain volumes: A comparison  
595 of optimized voxel-based morphometry to manual volumetry. *Neurobiol Aging.*  
596 30:1657–1676.
- 597 Koelkebeck K, Miyata J, Kubota M, Kohl W, Son S, Fukuyama H, Sawamoto N,  
598 Takahashi H, Murai T. 2014. The contribution of cortical thickness and surface area  
599 to gray matter asymmetries in the healthy human brain. *Hum Brain Mapp.* 35:6011–  
600 6022.
- 601 Kong XZ, Mathias SR, Guadalupe T, Abé C, Agartz I, Akudjedu TN, Aleman A, Alhu-  
602 sainsi S, Allen NB, Ames D, Andreassen OA, Vasquez AA, Armstrong NJ, Bergo F,  
603 Bastin ME, Batalla A, Bauer J, Baune BT, Baur-Streubel R, Biederman J, Blaine  
604 SK, Boedhoe P, Bøen E, Bose A, Bralten J, Brandeis D, Brem S, Brodaty H, Yüksel  
605 D, Brooks SJ, Buitelaar J, Bürger C, Bülow R, Calhoun V, Calvo A, Canales-  
606 Rodríguez EJ, Canive JM, Cannon DM, Caparelli EC, Castellanos FX, Cavalleri  
607 GL, Cendes F, Chaim-Avancini TM, Chantiluke K, Chen QL, Chen X, Cheng Y,  
608 Christakou A, Clark VP, Coghill D, Connolly CG, Conzelmann A, Córdova-  
609 Palomera A, Cousijn J, Crow T, Cubillo A, Dale A, Dannlowski U, De Bruttupilo SA,  
610 De Zeeuw P, Deary IJ, Delanty N, Demeter D V., Di Martino A, Dickie EW, Di-  
611 etsche B, Doan NT, Doherty CP, Doyle A, Durston S, Earl E, Ehrlich S, Ekman CJ,  
612 Elvsåshagen T, Epstein JN, Fair DA, Faraone S V., Fernández G, Filho GB, Förster  
613 K, Fouche JP, Foxe JJ, Frodl T, Fuentes-Claramonte P, Fullerton J, Garavan H,  
614 Garcia DDS, Gotlib IH, Goudriaan AE, Grabe HJ, Groenewold NA, Grotegerd D,  
615 Gruber O, Gurholt T, Haavik J, Hahn T, Hansell NK, Harris MA, Hartman CA, Her-  
616 nández MDCV, Heslenfeld D, Hester R, Hibar DP, Ho BC, Ho TC, Hoekstra PJ,  
617 Van Holst RJ, Hoogman M, Høvik MF, Howells FM, Hugdahl K, Huyser C, Ingvar  
618 M, Irwin L, Ishikawa A, James A, Jahanshad N, Jernigan TL, Jönsson EG, Kähler  
619 C, Kaleda V, Kelly C, Kerich M, Keshavan MS, Khadka S, Kircher T, Kohls G, Kon-

620 rad K, Korucuoglu O, Krämer B, Krug A, Kwon JS, Lambregts-Rommelse N, Lan-  
621 dén M, Lázaro L, Lebedeva I, Lenroot R, Lesch KP, Li Q, Lim KO, Liu J, Lochner C,  
622 London ED, Lonning V, Lorenzetti V, Luciano M, Luijten M, Lundervold AJ, MacKey  
623 S, MacMaster FP, Maingault S, Malpas CB, Malt UF, Mataix-Cols D, Martin-Santos  
624 R, Mayer AR, McCarthy H, Mitchell PB, Mueller BA, Maniega SM, Mazoyer B,  
625 McDonald C, McLellan Q, McMahon KL, McPhilemy G, Momenan R, Morales AM,  
626 Narayanaswamy JC, Moreira JCV, Nerland S, Nestor L, Newman E, Nigg JT,  
627 Nordvik JE, Novotny S, Weiss EO, O’Gorman RL, Oosterlaan J, Oranje B, Orr C,  
628 Overs B, Pauli P, Paulus M, Plessen KJ, Von Polier GG, Pomarol-Clotet E, Portella  
629 MJ, Qiu J, Radua J, Ramos-Quiroga JA, Reddy YCJ, Reif A, Roberts G, Rosa P,  
630 Rubia K, Sacchet MD, Sachdev PS, Salvador R, Schmaal L, Schulte-Rüther M,  
631 Schwaren L, Seidman L, Seitz J, Serpa MH, Shaw P, Shumskaya E, Silk TJ, Sim-  
632 mons AN, Simulionyte E, Sinha R, Sjoerds Z, Smelror RE, Soliva JC, Solowij N,  
633 Souza-Duran FL, Sponheim SR, Stein DJ, Stein EA, Stevens M, Strike LT, Sudre  
634 G, Sui J, Tamm L, Temmingh HS, Thoma RJ, Tomyshev A, Tronchin G, Turner J,  
635 Uhlmann A, Van Erp TGM, Van Den Heuvel OA, Van Der Meer D, Van Eijk L,  
636 Vance A, Veer IM, Veltman DJ, Venkatasubramanian G, Vilarroya O, Vives-Gi-  
637 labert Y, Voineskos AN, Völzke H, Vuletic D, Walitza S, Walter H, Walton E, Ward-  
638 law JM, Wen W, Westlye LT, Whelan CD, White T, Wiers RW, Wright MJ, Wittfeld  
639 K, Yang TT, Yasuda CL, Yoncheva Y, Yücel M, Yun JY, Zanetti MV, Zhen Z, Zhu  
640 XX, Ziegler GC, Zierhut K, De Zubicaray GI, Zwiers M, Glahn DC, Franke B,  
641 Crivello F, Tzourio-Mazoyer N, Fisher SE, Thompson PM, Francks C, Farde L,  
642 Flyckt L, Engberg G, Erhardt S, Fatouros-Bergman H, Cervenka S, Schwieler L,  
643 Piehl F, Collste K, Victorsson P, Malmqvist A, Hedberg M, Orhan F. 2018. Mapping  
644 cortical brain asymmetry in 17,141 healthy individuals worldwide via the ENIGMA  
645 consortium. *Proc Natl Acad Sci U S A*. 115:E5154–E5163.

646 Kurth F, Gaser C, Luders E. 2015. A 12-step user guide for analyzing voxel-wise gray  
647 matter asymmetries in statistical parametric mapping (SPM). *Nat Protoc*. 10:293–  
648 304.

649 La Joie R, Perrotin A, Barre L, Hommet C, Mezenge F, Ibazizene M, Camus V, Abbas  
650 A, Landeau B, Guilloteau D, de La Sayette V, Eustache F, Desgranges B, Chetelat

- 651 G. 2012. Region-specific hierarchy between atrophy, hypometabolism, and beta-  
652 amyloid (A $\beta$ ) load in Alzheimer's disease dementia. *J Neurosci*. 32:16265–  
653 16273.
- 654 Langergraber KE, Prüfer K, Rowney C, Boesch C, Crockford C, Fawcett K, Inoue E, In-  
655 oue-Muruyama M, Mitani JC, Muller MN, Robbins MM, Schubert G, Stoinski TS, Vi-  
656 ola B, Watts D, Wittig RM, Wrangham RW, Zuberbühler K, Pääbo S, Vigilant L.  
657 2012. Generation times in wild chimpanzees and gorillas suggest earlier diver-  
658 gence times in great ape and human evolution. *Proc Natl Acad Sci U S A*.  
659 109:15716–15721.
- 660 Li X, Crow TJ, Hopkins WD, Gong Q, Roberts N. 2018. Human torque is not present in  
661 chimpanzee brain. *Neuroimage*. 165:285–293.
- 662 Llado A, Tort-Merino A, Sanchez-Valle R, Falgas N, Balasa M, Bosch B, Castellvi M, Ol-  
663 ives J, Antonell A, Hornberger M. 2018. The hippocampal longitudinal axis-rele-  
664 vance for underlying tau and TDP-43 pathology. *Neurobiol Aging*. 70:1–9.
- 665 Luders E, Narr KL, Thompson PM, Rex DE, Jancke L, Toga AW. 2006. Hemispheric  
666 asymmetries in cortical thickness. *Cereb Cortex*. 16:1232–1238.
- 667 Lyn H, Pierre P, Bennett AJ, Fears S, Woods R, Hopkins WD. 2011. Planum temporale  
668 grey matter asymmetries in chimpanzees (*Pan troglodytes*), vervet (*Chlorocebus*  
669 *aethiops sabaeus*), rhesus (*Macaca mulatta*) and bonnet (*Macaca radiata*) mon-  
670 keys. *Neuropsychologia*. 49:2004–2012.
- 671 Mai JK, Majtanik M, Paxinos G. 2015. *Atlas of the Human Brain*. Elsevier Science.
- 672 Maingault S, Tzourio-Mazoyer N, Mazoyer B, Crivello F. 2016. Regional correlations be-  
673 tween cortical thickness and surface area asymmetries: A surface-based morphom-  
674 etry study of 250 adults. *Neuropsychologia*. 93:350–364.
- 675 Marie D, Roth M, Lacoste R, Nazarian B, Bertello A, Anton JL, Hopkins WD, Margiot-  
676 oudi K, Love SA, Meguerditchian A. 2018. Left Brain Asymmetry of the Planum  
677 Temporale in a Nonhominid Primate: Redefining the Origin of Brain Specialization  
678 for Language. *Cereb Cortex*. 28:1808–1815.
- 679 Plessen KJ, Hugdahl K, Bansal R, Hao X, Peterson BS. 2014. Sex, age, and cognitive  
680 correlates of asymmetries in thickness of the cortical mantle across the life span. *J*  
681 *Neurosci*. 34:6294–6302.

- 682 Rilling JK, Insel TR. 1999. The primate neocortex in comparative perspective using  
683 magnetic resonance imaging. *J Hum Evol.* 37:191–223.
- 684 Savage-Rumbaugh ES, Lewin R. 1994. *Kanzi : the ape at the brink of the human mind.*  
685 Wiley.
- 686 Savage-Rumbaugh S, McDonald K, Sevcik RA, Hopkins WD, Rubert E. 1986. Sponta-  
687 neous Symbol Acquisition and Communicative Use By Pygmy Chimpanzees (*Pan*  
688 *paniscus*), *Journal of Experimental Psychology: Gen.*
- 689 Schenker NM, Hopkins WD, Spocter MA, Garrison AR, Stimpson CD, Erwin JM, Hof  
690 PR, Sherwood CC. 2010. Broca's Area Homologue in Chimpanzees (*Pan troglo-*  
691 *dytes*): Probabilistic Mapping, Asymmetry, and Comparison to Humans. *Cereb Cor-*  
692 *tex.* 20:730–742.
- 693 Shamy JL, Habeck C, Hof PR, Amaral DG, Fong SG, Buonocore MH, Stern Y, Barnes  
694 CA, Rapp PR. 2011. Volumetric correlates of spatiotemporal working and recogni-  
695 tion memory impairment in aged rhesus monkeys. *Cereb Cortex.* 21:1559–1573.
- 696 Sherwood CC, Broadfield DC, Holloway RL, Gannon PJ, Hof PR. 2003. Variability of  
697 Broca's area homologue in African great apes: Implications for language evolution.  
698 *Anat Rec - Part A Discov Mol Cell Evol Biol.* 271:276–285.
- 699 Sherwood CC, Gordon AD, Allen JS, Phillips KA, Erwin JM, Hof PR, Hopkins WD. 2011.  
700 Aging of the cerebral cortex differs between humans and chimpanzees. *Proc Natl*  
701 *Acad Sci U S A.* 108:13029–13034.
- 702 Shumaker RW, Walkup KR, Beck BB. 2011. *Animal tool behavior : the use and manu-*  
703 *facture of tools by animals.* Johns Hopkins University Press.
- 704 Smith SM, Nichols TE. 2009. Threshold-free cluster enhancement: Addressing prob-  
705 lems of smoothing, threshold dependence and localisation in cluster inference.  
706 *Neuroimage.* 44:83–98.
- 707 Spocter MA, Hopkins WD, Garrison AR, Bauernfeind AL, Stimpson CD, Hof PR, Sher-  
708 wood CC. 2010. Wernicke's area homologue in chimpanzees (*Pan troglodytes*) and  
709 its relation to the appearance of modern human language. *Proc R Soc B Biol Sci.*  
710 277:2165–2174.
- 711 Takao H, Abe O, Yamasue H, Aoki S, Sasaki H, Kasai K, Yoshioka N, Ohtomo K. 2011.  
712 Gray and white matter asymmetries in healthy individuals aged 21-29 years: A

- 713 voxel-based morphometry and diffusion tensor imaging study. *Hum Brain Mapp.*  
714 32:1762–1773.
- 715 Toga AW, Thompson PM. 2003. Mapping brain asymmetry. *Nat Rev Neurosci.* 4:37–48.
- 716 Tomasello M, Call J. 1997. *Primate Cognition.*
- 717 Waal FBM de (Frans BM. 1996. *Good natured : the origins of right and wrong in humans*  
718 *and other animals.* Harvard University Press.
- 719 Watkins KE. 2001. Structural Asymmetries in the Human Brain: a Voxel-based Statisti-  
720 cal Analysis of 142 MRI Scans. *Cereb Cortex.* 11:868–877.
- 721 Xiang L, Crow T, Roberts N. 2019. Cerebral torque is human specific and unrelated to  
722 brain size. *Brain Struct Funct.* 224:1141–1150.
- 723 Zhou D, Lebel C, Evans A, Beaulieu C. 2013. Cortical thickness asymmetry from child-  
724 hood to older adulthood. *Neuroimage.* 83:66–74.
- 725 Zilles K, Armstrong E, Moser KH, Schleicher A, Stephan H. 1989. Gyrification in the cer-  
726 ebral cortex of primates. *Brain Behav Evol.* 34:143–150.
- 727 Zilles K, Dabringhaus A, Geyer S, Amunts K, Qü M, Schleicher A, Gilissen E, Schlaug  
728 G, Steinmetz H. 1996. Structural asymmetries in the human forebrain and the fore-  
729 brain of non- human primates and rats. In: *Neuroscience and Biobehavioral Re-*  
730 *views.* Elsevier Ltd. p. 593–605.

731

## 732 **Supplementary**

### 733 Supplementary 1.1 DICOM conversion and De-noising

734 The structural T1-weighted images were provided by the NCBR in their original DICOM  
735 format and then converted into Nifti using MRICron's function `dicom2nii`. If multiple scans were  
736 available, the average was computed. Following DICOM conversion each image was cleaned of  
737 noise (Manjon et al. 2010) and signal inhomogeneity and resliced to 0.6 mm isotropic resolution.  
738 Finally, the anterior commissure was manually set as the center (0,0,0) of all Nifti's to aid in af-  
739 fine preprocessing.

740



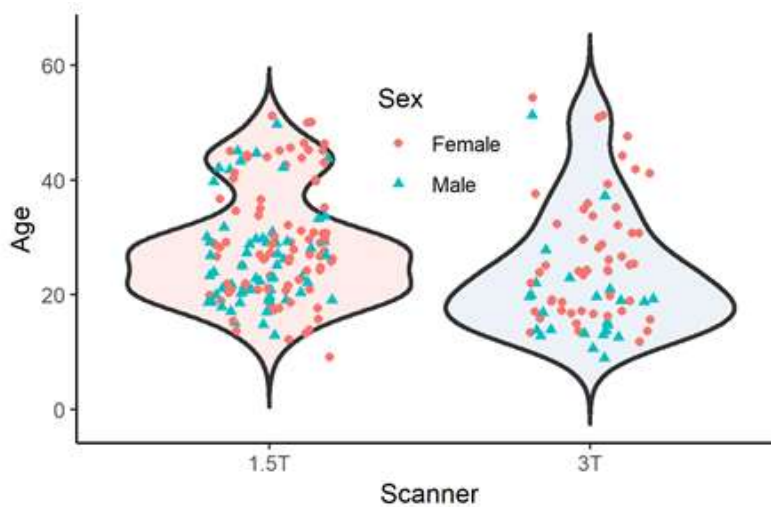

741

742 **Supplementary Figure 1.** Age and sex distribution of complete 223 chimpanzees separated by  
743 scanner strength.

744

#### 745 Supplementary 1.2 Chimpanzee QC

746 CAT12 provides quality measures pertaining to the noise, bias inhomogeneities, resolu-  
747 tion and an overall compounded score of the original input image. Using these ratings, poor im-  
748 ages were flagged for visual inspection when they were 2 standard deviations (std) away from  
749 the sample mean of each rating. The preprocessed modulated GM maps were then tested for  
750 sample inhomogeneity separately for each scanner (3T & 1.5T) and those that have a mean  
751 correlation below 2 std were flagged for visual inspection. Once the original image was flagged,  
752 affine GM, and modulated GM maps were inspected for poor quality, tissue misclassification,  
753 artefacts, irregular deformations, and very high intensities. For the second iteration, the passed  
754 modulated GM maps were tested again for mean correlation as a complete sample, flagging the  
755 images below 3 std for visual inspection. Looking for the same features as in the initial QC itera-  
756 tion. Following the two iterations of QC a total of 178 chimpanzees (120 females, 11 – 54 y/o,  
757 mean =  $26.7 \pm 9.8$ ) qualified for statistical analysis.

#### 758 Supplementary 1.3 CAT12 Preprocessing Segmentation

759 Structural image segmentation in CAT12 builds on the TPM-based approach employed  
760 by SPM12, whereby, the gray/white image intensity is aided with a priori tissue probabilities in  
761 initial segmentation and affine registration as it is in common template space. Another ad-  
762 vantage of a TPM is that one has a template for initial affine registration, which then enables the  
763 segment maps to be non-linearly registered and spatially normalized to corresponding segment

764 maps of the chimpanzee shooting templates. Lowering the possibility for registration errors im-  
 765 proves the quality of the final normalized image. Improving upon SPM's segmentation  
 766 (Ashburner and Friston 2005), CAT12 employs Local Adaptive Segmentation (LAS) (Dahnke et  
 767 al. 2012), Adaptive Maximum A Posterior segmentation (AMAP) (Dahnke and Gaser 2017), and  
 768 Partial Volume Estimation (PVE) (Tohka et al. 2004). LAS creates local intensity transformations  
 769 for all tissue types to limit GM misclassification due to varying GM intensity in regions such as  
 770 the occipital, basal ganglia, and motor cortex as a result of anatomical properties (e.g. high my-  
 771 elination and iron content). AMAP segmentation takes the initially segmented, aligned, and skull  
 772 stripped image created utilizing the TPM and disregards the a priori information of the TPM, to  
 773 conduct an adaptive AMAP estimation where local variations are modelled by slowly varying  
 774 spatial functions (Rajapakse et al. 1997). Along with the classical three tissue types for segmen-  
 775 tation (GM, WM, & CSF) based on the AMAP estimation, an additional two PVE classes (GM-  
 776 WM & GM-CSF) are created resulting in an estimate of the fraction of each tissue type con-  
 777 tained in each voxel. These features outlined above of our pipeline allow for more accurate tis-  
 778 sue segmentation and therefore a better representation of macroanatomical GM levels for anal-  
 779 ysis.

780

781 Supplementary Table 1. DaVi Labels

| Label Number | DaVi Label                       | Brain Region | Hemisphere | Acronyms |
|--------------|----------------------------------|--------------|------------|----------|
| 1            | Anterior Superior Frontal Gyrus  | Frontal      | left       | L.aSFG   |
| 2            | Anterior Superior Frontal Gyrus  | Frontal      | right      | R.aSFG   |
| 3            | Middle Superior Frontal Gyrus    | Frontal      | left       | L.mSFG   |
| 4            | Middle Superior Frontal Gyrus    | Frontal      | right      | R.mSFG   |
| 5            | Posterior Superior Frontal Gyrus | Frontal      | left       | L.pSFG   |
| 6            | Posterior Superior Frontal Gyrus | Frontal      | right      | R.pSFG   |
| 7            | Anterior Middle Frontal Gyrus    | Frontal      | left       | L.aMFG   |
| 8            | Anterior Middle Frontal Gyrus    | Frontal      | right      | R.aMFG   |
| 9            | Posterior Middle Frontal Gyrus   | Frontal      | left       | L.pMFG   |
| 10           | Posterior Middle Frontal Gyrus   | Frontal      | right      | R.pMFG   |
| 11           | Anterior Inferior Frontal Gyrus  | Frontal      | left       | L.aIFG   |
| 12           | Anterior Inferior Frontal Gyrus  | Frontal      | right      | R.aIFG   |
| 13           | Middle Inferior Frontal Gyrus    | Frontal      | left       | L.mIFG   |
| 14           | Middle Inferior Frontal Gyrus    | Frontal      | right      | R.mIFG   |
| 15           | Posterior Inferior Frontal Gyrus | Frontal      | left       | L.pIFG   |
| 16           | Posterior Inferior Frontal Gyrus | Frontal      | right      | R.pIFG   |
| 17           | Medial Orbitofrontal Cortex      | Frontal      | left       | L.mOFC   |
| 18           | Medial Orbitofrontal Cortex      | Frontal      | right      | R.mOFC   |

|    |                                     |          |       |         |
|----|-------------------------------------|----------|-------|---------|
| 19 | Lateral Orbitofrontal Cortex        | Frontal  | left  | L.IOFC  |
| 20 | Lateral Orbitofrontal Cortex        | Frontal  | right | R.IOFC  |
| 21 | Anterior Cingulate Cortex           | Limbic   | left  | L.ACC   |
| 22 | Anterior Cingulate Cortex           | Limbic   | right | R.ACC   |
| 23 | Middle Cingulate Cortex             | Limbic   | left  | L.MCC   |
| 24 | Middle Cingulate Cortex             | Limbic   | right | R.MCC   |
| 25 | Posterior Cingulate Cortex          | Limbic   | left  | L.PCC   |
| 26 | Posterior Cingulate Cortex          | Limbic   | right | R.PCC   |
| 27 | Superior Precentral Gyrus           | Frontal  | left  | L.sPrCG |
| 28 | Superior Precentral Gyrus           | Frontal  | right | R.sPrCG |
| 29 | Middle Precentral Gyrus             | Frontal  | left  | L.mPrCG |
| 30 | Middle Precentral Gyrus             | Frontal  | right | R.mPrCG |
| 31 | Inferior Precentral Gyrus           | Frontal  | left  | L.iPrCG |
| 32 | Inferior Precentral Gyrus           | Frontal  | right | R.iPrCG |
| 33 | Paracentral Lobule                  | Parietal | left  | L.PCL   |
| 34 | Paracentral Lobule                  | Parietal | right | R.PCL   |
| 35 | Frontal Operculum                   | Frontal  | left  | L.FOP   |
| 36 | Frontal Operculum                   | Frontal  | right | R.FOP   |
| 37 | Parietal Operculum                  | Parietal | left  | L.POP   |
| 38 | Parietal Operculum                  | Parietal | right | R.POP   |
| 39 | Anterior Insula                     | Temporal | left  | L.aIns  |
| 40 | Anterior Insula                     | Temporal | right | R.aIns  |
| 41 | Posterior Insula                    | Temporal | left  | L.pIns  |
| 42 | Posterior Insula                    | Temporal | right | R.pIns  |
| 43 | Anterior Transverse Temporal Gyrus  | Temporal | left  | L.aTTG  |
| 44 | Anterior Transverse Temporal Gyrus  | Temporal | right | R.aTTG  |
| 45 | Posterior Transverse Temporal Gyrus | Temporal | left  | L.pTTG  |
| 46 | Posterior Transverse Temporal Gyrus | Temporal | right | R.pTTG  |
| 47 | Anterior Superior Temporal Gyrus    | Temporal | left  | L.aSTG  |
| 48 | Anterior Superior Temporal Gyrus    | Temporal | right | R.aSTG  |
| 49 | Posterior Superior Temporal Gyrus   | Temporal | left  | L.pSTG  |
| 50 | Posterior Superior Temporal Gyrus   | Temporal | right | R.pSTG  |
| 51 | Anterior Middle Temporal Gyrus      | Temporal | left  | L.aMTG  |
| 52 | Anterior Middle Temporal Gyrus      | Temporal | right | R.aMTG  |
| 53 | Posterior Middle Temporal Gyrus     | Temporal | left  | L.pMTG  |
| 54 | Posterior Middle Temporal Gyrus     | Temporal | right | R.pMTG  |
| 55 | Anterior Inferior Temporal Gyrus    | Temporal | left  | L.aITG  |
| 56 | Anterior Inferior Temporal Gyrus    | Temporal | right | R.aITG  |
| 57 | Posterior Inferior Temporal Gyrus   | Temporal | left  | L.pITG  |
| 58 | Posterior Inferior Temporal Gyrus   | Temporal | right | R.pITG  |
| 59 | Entorhinal Cortex                   | Temporal | left  | L.EHC   |
| 60 | Entorhinal Cortex                   | Temporal | right | R.EHC   |
| 61 | Anterior Fusiform Gyrus             | Temporal | left  | L.aFFG  |

|     |                            |               |       |         |
|-----|----------------------------|---------------|-------|---------|
| 62  | Anterior Fusiform Gyrus    | Temporal      | right | R.aFFG  |
| 63  | Posterior Fusiform Gyrus   | Temporal      | left  | L.pFFG  |
| 64  | Posterior Fusiform Gyrus   | Temporal      | right | R.pFFG  |
| 65  | Parahippocampal Gyrus      | Temporal      | left  | L.PHC   |
| 66  | Parahippocampal Gyrus      | Temporal      | right | R.PHC   |
| 67  | Amygdala                   | Temporal      | left  | L.Amy   |
| 68  | Amygdala                   | Temporal      | right | R.Amy   |
| 69  | Hippocampus                | Temporal      | left  | L.HC    |
| 70  | Hippocampus                | Temporal      | right | R.HC    |
| 71  | Superior Postcentral Gyrus | Parietal      | left  | L.sPoCG |
| 72  | Superior Postcentral Gyrus | Parietal      | right | R.sPoCG |
| 73  | Middle Postcentral Gyrus   | Parietal      | left  | L.mPoCG |
| 74  | Middle Postcentral Gyrus   | Parietal      | right | R.mPoCG |
| 75  | Inferior Postcentral Gyrus | Parietal      | left  | L.iPoCG |
| 76  | Inferior Postcentral Gyrus | Parietal      | right | R.iPoCG |
| 77  | Superior Parietal Lobule   | Parietal      | left  | L.SPL   |
| 78  | Superior Parietal Lobule   | Parietal      | right | R.SPL   |
| 79  | Supramarginal Gyrus        | Parietal      | left  | L.SMG   |
| 80  | Supramarginal Gyrus        | Parietal      | right | R.SMG   |
| 81  | Angular Gyrus              | Parietal      | left  | L.AnG   |
| 82  | Angular Gyrus              | Parietal      | right | R.AnG   |
| 83  | Precuneus                  | Parietal      | left  | L.PCun  |
| 84  | Precuneus                  | Parietal      | right | R.PCun  |
| 85  | Cuneus                     | Occipital     | left  | L.Cun   |
| 86  | Cuneus                     | Occipital     | right | R.Cun   |
| 87  | Lingual Gyrus              | Occipital     | left  | L.LG    |
| 88  | Lingual Gyrus              | Occipital     | right | R.LG    |
| 89  | Calcarine Sulcus           | Occipital     | left  | L.Calc  |
| 90  | Calcarine Sulcus           | Occipital     | right | R.Calc  |
| 91  | Superior Occipital Gyrus   | Occipital     | left  | L.sOG   |
| 92  | Superior Occipital Gyrus   | Occipital     | right | R.sOG   |
| 93  | Middle Occipital Gyrus     | Occipital     | left  | L.mOG   |
| 94  | Middle Occipital Gyrus     | Occipital     | right | R.mOG   |
| 95  | Inferior Occipital Gyrus   | Occipital     | left  | L.iOG   |
| 96  | Inferior Occipital Gyrus   | Occipital     | right | R.iOG   |
| 97  | Caudate Nucleus            | Basal Ganglia | left  | L.CN    |
| 98  | Caudate Nucleus            | Basal Ganglia | right | R.CN    |
| 99  | Nucleus Accumbens          | Basal Ganglia | left  | L.NA    |
| 100 | Nucleus Accumbens          | Basal Ganglia | right | R.NA    |
| 101 | Basal Forebrain Nuclei     | Basal Ganglia | left  | L.BF    |
| 102 | Basal Forebrain Nuclei     | Basal Ganglia | right | R.BF    |
| 103 | Putamen                    | Basal Ganglia | left  | L.Pu    |
| 104 | Putamen                    | Basal Ganglia | right | R.Pu    |

|     |                                                                                     |               |       |           |
|-----|-------------------------------------------------------------------------------------|---------------|-------|-----------|
| 105 | Globus pallidus                                                                     | Basal Ganglia | left  | L.GP      |
| 106 | Globus pallidus                                                                     | Basal Ganglia | right | R.GP      |
| 107 | Thalamus                                                                            | Basal Ganglia | left  | L.Th      |
| 108 | Thalamus                                                                            | Basal Ganglia | right | R.Th      |
| 109 | Hypothalamus                                                                        | Basal Ganglia | left  | L.HTh     |
| 110 | Hypothalamus                                                                        | Basal Ganglia | right | R.HTh     |
| 111 | Cerebellum IX-Tonsil                                                                | Cerebellum    | left  | L.CerIX   |
| 112 | Cerebellum IX-Tonsil                                                                | Cerebellum    | right | R.CerIX   |
| 113 | Cerebellum VIIIAB-Inferior Posterior - PML                                          | Cerebellum    | left  | L.CerVIII |
| 114 | Cerebellum VIIIAB-Inferior Posterior - PML                                          | Cerebellum    | right | R.CerVIII |
| 115 | Cerebellum VIIA - Superior Posterior - Crus I of Ansiform Lobule                    | Cerebellum    | left  | L.CrusI   |
| 116 | Cerebellum VIIA - Superior Posterior - Crus I of Ansiform Lobule                    | Cerebellum    | right | R.CrusI   |
| 117 | Cerebellum VIIA - Superior Posterior - Crus II of Ansiform Lobule with Paramedian 1 | Cerebellum    | left  | L.CrusII  |
| 118 | Cerebellum VIIA-Superior Posterior - Crus II of Ansiform Lobule with Paramedian 1   | Cerebellum    | right | R.CrusII  |
| 119 | Cerebellum VI-Superior Posterior                                                    | Cerebellum    | left  | L.CerVI   |
| 120 | Cerebellum VI-Superior Posterior                                                    | Cerebellum    | right | R.CerVI   |
| 121 | Cerebellum V-Anterior B                                                             | Cerebellum    | left  | L.CerVB   |
| 122 | Cerebellum V-Anterior B                                                             | Cerebellum    | right | R.CerVB   |
| 123 | Cerebellum V-Anterior A                                                             | Cerebellum    | left  | L.CerVA   |
| 124 | Cerebellum V-Anterior A                                                             | Cerebellum    | right | R.CerVA   |
| 125 | Cerebellum IV-Anterior Quadrangulate                                                | Cerebellum    | left  | L.CerIV   |
| 126 | Cerebellum IV-Anterior Quadrangulate                                                | Cerebellum    | right | R.CerIV   |
| 127 | Cerebellum III-Anterior Quadrangulate                                               | Cerebellum    | left  | L.CerIII  |
| 128 | Cerebellum III-Anterior Quadrangulate                                               | Cerebellum    | right | R.CerIII  |
| 129 | Cerebellum II-Anterior Quadrangulate                                                | Cerebellum    | left  | L.CerII   |
| 130 | Cerebellum II-Anterior Quadrangulate                                                | Cerebellum    | right | R.CerII   |

782

783 Supplementary Table 2. DaVi Labels Age Effect on Gray Matter Volume

| <i>DaVi Label</i>                         | <i>T-statistic</i> | <i>p-value</i> |
|-------------------------------------------|--------------------|----------------|
| <b>Frontal Cortex</b>                     |                    |                |
| Anterior Superior Frontal Gyrus (L.aSFG)  | -1.57              | 0.1184         |
| Anterior Superior Frontal Gyrus (R.aSFG)  | -1.16              | 0.2482         |
| Middle Superior Frontal Gyrus (L.mSFG)    | -3.57              | 0.0005         |
| Middle Superior Frontal Gyrus (R.mSFG)    | -3.55              | 0.0005         |
| Posterior Superior Frontal Gyrus (L.pSFG) | -3.07              | 0.0025         |



|                                           |       |                       |
|-------------------------------------------|-------|-----------------------|
| Posterior Superior Frontal Gyrus (R.pSFG) | -2.36 | 0.0195                |
| Anterior Middle Frontal Gyrus (L.aMFG)    | -1.08 | 0.2814                |
| Anterior Middle Frontal Gyrus (R.aMFG)    | -2.11 | 0.0365                |
| Posterior Middle Frontal Gyrus (L.pMFG)   | -1.88 | 0.0614                |
| Posterior Middle Frontal Gyrus (R.pMFG)   | -1.79 | 0.0757                |
| Anterior Inferior Frontal Gyrus (L.aIFG)  | -1.27 | 0.2048                |
| Anterior Inferior Frontal Gyrus (R.aIFG)  | -1.52 | 0.1300                |
| Middle Inferior Frontal Gyrus (L.mIFG)    | -1.79 | 0.0747                |
| Middle Inferior Frontal Gyrus (R.mIFG)    | -2.65 | 0.0089                |
| Posterior Inferior Frontal Gyrus (L.pIFG) | -2.83 | 0.0052                |
| Posterior Inferior Frontal Gyrus (R.pIFG) | -2.00 | 0.0468                |
| Medial Orbitofrontal Cortex (L.mOFC)      | -1.82 | 0.0711                |
| Medial Orbitofrontal Cortex (R.mOFC)      | -1.83 | 0.0697                |
| Lateral Orbitofrontal Cortex (L.IOFC)*    | -4.31 | 3.0x10 <sup>-5</sup>  |
| Lateral Orbitofrontal Cortex (R.IOFC)*    | -3.79 | 0.0002                |
| Superior Precentral Gyrus (L.sPrCG)       | -1.96 | 0.0511                |
| Superior Precentral Gyrus (R.sPrCG)       | -0.47 | 0.6380                |
| Middle Precentral Gyrus (L.mPrCG)         | -1.96 | 0.0519                |
| Middle Precentral Gyrus (R.mPrCG)         | -1.34 | 0.1836                |
| Inferior Precentral Gyrus (L.iPrCG)       | -1.78 | 0.0766                |
| Inferior Precentral Gyrus (R.iPrCG)       | -1.20 | 0.2312                |
| Frontal Operculum (L.FOP)                 | -2.74 | 0.0067                |
| Frontal Operculum (R.FOP)                 | -1.55 | 0.1227                |
| <b>Limbic Cortex</b>                      |       |                       |
| Anterior Cingulate Gyrus (L.ACC)          | -2.70 | 0.0076                |
| Anterior Cingulate Gyrus (R.ACC)          | -3.08 | 0.0024                |
| Middle Cingulate Gyrus (L.MCC)*           | -4.02 | 0.0001                |
| Middle Cingulate Gyrus (R.MCC)*           | -4.31 | 2.72x10 <sup>-5</sup> |
| Posterior Cingulate Gyrus (L.PCC)         | -3.37 | 0.0009                |
| Posterior Cingulate Gyrus (R.PCC)*        | -3.81 | 0.0002                |
| Entorhinal Cortex (L.EG)                  | -0.43 | 0.6685                |
| Entorhinal Cortex (R.EG)                  | -1.22 | 0.2229                |
| Parahippocampal Gyrus (L.PHC)             | -2.70 | 0.0077                |
| Parahippocampal Gyrus (R.PHC)             | -3.15 | 0.0019                |
| Amygdala (L.Amy)                          | -3.26 | 0.0014                |
| Amygdala (R.Amy)                          | -2.73 | 0.0070                |
| Hippocampus (L.HC)                        | -0.72 | 0.4735                |
| Hippocampus (R.HC)                        | -1.19 | 0.2366                |
| <b>Temporal Cortex</b>                    |       |                       |
| Anterior Insula (L.aIns)                  | -2.92 | 0.0040                |
| Anterior Insula (R.aIns)                  | -3.09 | 0.0024                |
| Posterior Insula (L.pIns)                 | -1.87 | 0.0631                |
| Posterior Insula (R.pIns)                 | -2.01 | 0.0463                |

|                                              |       |                       |
|----------------------------------------------|-------|-----------------------|
| Anterior Transverse Temporal Gyrus (L.aTTG*) | -4.77 | 3.90x10 <sup>-6</sup> |
| Anterior Transverse Temporal Gyrus (R.aTTG)  | -3.15 | 0.0019                |
| Posterior Transverse Temporal Gyrus (R.pTTG) | -2.35 | 0.0198                |
| Posterior Transverse Temporal Gyrus (L.pTTG) | -2.52 | 0.0126                |
| Anterior Superior Temporal Gyrus (L.aSTG)    | -2.57 | 0.0111                |
| Anterior Superior Temporal Gyrus (R.aSTG)    | -1.53 | 0.1269                |
| Posterior Superior Temporal Gyrus (L.pSTG)   | -2.60 | 0.0103                |
| Posterior Superior Temporal Gyrus (R.pSTG)   | -3.26 | 0.0014                |
| Anterior Middle Temporal Gyrus (L.aMTG)      | -1.74 | 0.0837                |
| Anterior Middle Temporal Gyrus (R.aMTG)      | -1.36 | 0.1759                |
| Posterior Middle Temporal Gyrus (L.pMTG)     | -1.06 | 0.2888                |
| Posterior Middle Temporal Gyrus (R.pMTG)     | -0.95 | 0.3456                |
| Anterior Inferior Temporal Gyrus (L.aITG)    | -2.15 | 0.0327                |
| Anterior Inferior Temporal Gyrus (R.aITG)    | -2.35 | 0.0201                |
| Posterior Inferior Temporal Gyrus (L.pITG)   | -1.83 | 0.0689                |
| Posterior Inferior Temporal Gyrus (R.pITG)   | -2.92 | 0.0040                |
| Anterior Fusiform Gyrus (L.aFFG)             | -2.12 | 0.0354                |
| Anterior Fusiform Gyrus (R.aFFG)             | -2.20 | 0.0291                |
| Posterior Fusiform Gyrus (L.pFFG)            | -3.47 | 0.0007                |
| Posterior Fusiform Gyrus (R.pFFG)            | -3.49 | 0.0006                |
| <b>Parietal Cortex</b>                       |       |                       |
| Superior Postcentral Gyrus (L.sPotCG)        | -2.25 | 0.0260                |
| Superior Postcentral Gyrus (R.sPoCG)         | -0.50 | 0.6196                |
| Middle Postcentral Gyrus (L.mPoCG)           | -1.18 | 0.2409                |
| Middle Postcentral Gyrus (R.mPoCG)           | -0.41 | 0.6851                |
| Inferior Postcentral Gyrus (L.iPoCG)         | -1.96 | 0.0516                |
| Inferior Postcentral Gyrus (R.iPoCG)         | -0.66 | 0.5092                |
| Superior Parietal Lobule (L.SPL)             | -2.06 | 0.0412                |
| Superior Parietal Lobule (R.SPL)             | -1.25 | 0.2121                |
| Supramarginal Gyrus (L.SMG)                  | -1.38 | 0.1688                |
| Supramarginal Gyrus (R.SMG)                  | -1.22 | 0.2222                |
| Angular Gyrus (L.AG)                         | -2.25 | 0.0257                |
| Angular Gyrus (R.AG)                         | -1.68 | 0.0942                |
| Parietal Operculum (L.POP)                   | -1.82 | 0.0699                |
| Parietal Operculum (R.POP)                   | -0.82 | 0.4149                |
| Paracentral Lobule (L.PCL)                   | -1.51 | 0.1321                |
| Paracentral Lobule (R.PCL)                   | -0.42 | 0.6743                |
| Precuneus (L.PCun)                           | -3.48 | 0.0006                |
| Precuneus (R.PCun)*                          | -3.93 | 0.0001                |
| <b>Occipital</b>                             |       |                       |
| Cuneus (L.Cun)                               | -1.99 | 0.0485                |
| Cuneus (R.Cun)                               | -2.66 | 0.0085                |
| Lingual Gyrus (L.LG)                         | -3.30 | 0.0012                |

|                                                         |       |                        |
|---------------------------------------------------------|-------|------------------------|
| Lingual Gyrus (R.LG)*                                   | -4.11 | 0.0001                 |
| Calcarine Sulcus (R.Calc)                               | -3.04 | 0.0028                 |
| Calcarine Sulcus (L.Calc)*                              | -3.75 | 0.0002                 |
| Superior Occipital Gyrus (L.sOG)                        | -1.85 | 0.0657                 |
| Superior Occipital Gyrus (R.sOG)                        | -2.23 | 0.0267                 |
| Middle Occipital Gyrus (L.mOG)                          | 0.34  | 0.7351                 |
| Middle Occipital Gyrus (R.mOG)                          | -0.75 | 0.4525                 |
| Inferior Occipital Gyrus (L.iOG)                        | -0.53 | 0.5947                 |
| Inferior Occipital Gyrus (R.iOG)                        | -1.20 | 0.2313                 |
| <b>Basal Ganglia</b>                                    |       |                        |
| Caudate Nuclues (L.CN)*                                 | -5.05 | 1.12x10 <sup>-6</sup>  |
| Caudate Nuclues (R.CN)*                                 | -5.70 | 4.99x10 <sup>-8</sup>  |
| Nucleus Accumbens (L.NA)*                               | -4.77 | 3.84x10 <sup>-6</sup>  |
| Nucleus Accumbens (R.NA)*                               | -4.23 | 3.81x10 <sup>-5</sup>  |
| Basal Forebrain Nuclei (L.BF)                           | -1.25 | 0.2131                 |
| Basal Forebrain Nuclei (R.BF)                           | -1.77 | 0.0792                 |
| Putamen (L.Pu)*                                         | -6.18 | 4.55x10 <sup>-9</sup>  |
| Putamen (R.Pu)*                                         | -6.68 | 3.10x10 <sup>-10</sup> |
| Globus Pallidus (L.GP)                                  | 1.68  | 0.0954                 |
| Globus Pallidus (R.GP)                                  | 2.72  | 0.0073                 |
| Thalamus (L.Th)                                         | -0.31 | 0.7585                 |
| Thalamus (R.Th)                                         | 1.00  | 0.3210                 |
| Hypothalamus (L.HTh)                                    | -1.78 | 0.0762                 |
| Hypothalamus (R.HTh)                                    | -1.26 | 0.2111                 |
| <b>Cerebellum</b>                                       |       |                        |
| Cerebellum IX-Tonsil (L.CerIX)                          | -2.46 | 0.0149                 |
| Cerebellum IX-Tonsil (R.CerIX)                          | -2.85 | 0.0049                 |
| Cerebellum VIIIAB-Inferior Posterior -PML (L.CerVIIIAB) | -2.46 | 0.0147                 |
| Cerebellum VIIIAB-Inferior Posterior -PML (R.CerVIIIAB) | -2.97 | 0.0034                 |
| Cerebellum VIIA-Superior Posterior -Crus I (L.CrusI)    | -1.29 | 0.1971                 |
| Cerebellum VIIA-Superior Posterior -Crus I (R.CrusI)    | -1.94 | 0.0534                 |
| Cerebellum VIIA-Superior Posterior -Crus II (L.CrusII)  | -2.79 | 0.0059                 |
| Cerebellum VIIA-Superior Posterior -Crus II (R.CrusII)* | -3.75 | 0.0002                 |
| Cerebellum VI-Superior Posterior (L.CerVI)              | -3.17 | 0.0018                 |
| Cerebellum VI-Superior Posterior (R.CerVI)              | -3.38 | 0.0009                 |
| Cerebellum V-Anterior B (L.CerVB)                       | -2.99 | 0.0032                 |
| Cerebellum V-Anterior B (R.CerVB)                       | -3.13 | 0.0020                 |
| Cerebellum V-Anterior A (L.CerVA)*                      | -3.78 | 0.0002                 |
| Cerebellum V-Anterior A (R.CerVA)*                      | -4.88 | 2.35x10 <sup>-6</sup>  |
| Cerebellum IV-Anterior Quadrangulate (L.CerIV)*         | -4.39 | 1.95x10 <sup>-5</sup>  |
| Cerebellum IV-Anterior Quadrangulate (R.CerIV)*         | -5.71 | 4.83x10 <sup>-8</sup>  |
| Cerebellum III-Anterior Quadrangulate (L.CerIII)*       | -3.77 | 0.0002                 |
| Cerebellum III-Anterior Quadrangulate (R.CerIII)*       | -4.46 | 1.50x10 <sup>-5</sup>  |

|                                                |       |        |
|------------------------------------------------|-------|--------|
| Cerebellum II-Anterior Quadrangulate (L.CerII) | -3.18 | 0.0018 |
| Cerebellum II-Anterior Quadrangulate (R.CerII) | -2.83 | 0.0052 |

784 **Key:** L. refers to region in the left hemisphere, while R. the right hemisphere. \* multiple compari-  
 785 sons correction at FWE  $p \leq 0.05$ .  
 786

787 Supplementary Table 3. DaVi labels cortical hemispheric asymmetry

788

| <i>DaVi Label</i>                           | <i>T-statistic</i> | <i>p-value</i>         |
|---------------------------------------------|--------------------|------------------------|
| <b>Leftward Asymmetry</b>                   |                    |                        |
| <b>Frontal Cortex</b>                       |                    |                        |
| Anterior Superior Frontal Gyrus (aSFG)*     | 6.43               | 1.17x10 <sup>-9</sup>  |
| Middle Superior Frontal Gyrus (mSFG)        | 2.45               | 0.0155                 |
| Anterior Middle Frontal Gyrus (aMFG)        | 2.07               | 0.0395                 |
| Posterior Middle Frontal Gyrus (pMFG)       | 0.84               | 0.4019                 |
| Anterior Inferior Frontal Gyrus (aIFG)      | 0.61               | 0.5434                 |
| Posterior Inferior Frontal Gyrus (pIFG)     | 2.91               | 0.0041                 |
| Medial Orbitofrontal Cortex (mOFC)*         | 4.42               | 1.70x10 <sup>-5</sup>  |
| Superior Precentral Gyrus (sPrCG)           | 1.30               | 0.1968                 |
| Middle Precentral Gyrus (mPrCG)             | 2.94               | 0.0037                 |
| Inferior Precentral Gyrus (iPrCG)           | 0.15               | 0.8807                 |
| <b>Limbic Cortex</b>                        |                    |                        |
| Anterior Cingulate Gyrus (ACC)              | 1.84               | 0.0676                 |
| Hippocampus (HC)*                           | 6.70               | 2.70x10 <sup>-10</sup> |
| <b>Temporal Cortex</b>                      |                    |                        |
| Anterior Insula (aIns)*                     | 6.47               | 9.38x10 <sup>-10</sup> |
| Posterior Insula (pIns)*                    | 7.63               | 1.38x10 <sup>-12</sup> |
| Anterior Transverse Temporal Gyrus (aTTG)   | 2.49               | 0.0138                 |
| Posterior Transverse Temporal Gyrus (pTTG)* | 10.14              | 2.50x10 <sup>-19</sup> |
| Posterior Middle Temporal Gyrus (pMTG)      | 1.65               | 0.1011                 |
| Anterior Inferior Temporal Gyrus (aITG)     | 2.34               | 0.0202                 |
| Posterior Inferior Temporal Gyrus (pITG)    | 0.64               | 0.5206                 |
| Anterior Fusiform Gyrus (aFFG)              | 1.48               | 0.1404                 |
| <b>Parietal Cortex</b>                      |                    |                        |
| Inferior Precentral Gyrus (iPoCG)*          | 6.93               | 7.63x10 <sup>-11</sup> |
| Supramarginal Gyrus (SMG)*                  | 5.73               | 4.31x10 <sup>-8</sup>  |
| <b>Occipital Cortex</b>                     |                    |                        |
| Superior Occipital Gyrus (sOG)*             | 4.16               | 4.98x10 <sup>-5</sup>  |
| Middle Occipital Gyrus (mOG)                | 1.22               | 0.2255                 |
| Inferior Occipital Gyrus (iOG)              | 0.37               | 0.7087                 |

|                                                |        |                        |
|------------------------------------------------|--------|------------------------|
| <b>Basal Ganglia</b>                           |        |                        |
| Basal Forebrain Nuclei (BF)*                   | 9.29   | 5.54x10 <sup>-17</sup> |
| Putamen (Pu)*                                  | 7.99   | 5.10x10 <sup>-11</sup> |
| Hypothalamus (HTh)*                            | 7.27   | 1.13x10 <sup>-11</sup> |
| <b>Cerebellum</b>                              |        |                        |
| Cerebellum Crus I (CrusI)                      | 0.56   | 0.5759                 |
| Cerebellum Crus II (CrusII)                    | 0.74   | 0.4598                 |
| Cerebellum IV-Anterior Quadrangulate (CerIV)*  | 5.03   | 1.19x10 <sup>-6</sup>  |
| Cerebellum III-Anterior Quadrangulate (CerIII) | 2.24   | 0.0262                 |
| <b>Rightward Asymmetry</b>                     |        |                        |
| <b>Frontal Cortex</b>                          |        |                        |
| Posterior Superior Frontal Gyrus (pSFG)*       | -5.33  | 2.93x10 <sup>-7</sup>  |
| Middle Inferior Frontal Gyrus (mIFG)           | -0.20  | 0.8418                 |
| Lateral Orbitofrontal Cortex (IOFC)            | -1.99  | 0.0486                 |
| Frontal Operculum (FOP)                        | -2.68  | 0.0081                 |
| <b>Limbic Cortex</b>                           |        |                        |
| Middle Cingulate Gyrus (MCC)                   | -0.96  | 0.3603                 |
| Posterior Cingulate Gyrus (PCC)*               | -7.53  | 2.48x10 <sup>-12</sup> |
| Parahippocampal Gyrus (PHC)*                   | -5.24  | 4.50x10 <sup>-7</sup>  |
| Amygdala (Amy)                                 | -1.35  | 0.1803                 |
| Entorhinal Cortex (EG)*                        | -6.99  | 5.35x10 <sup>-11</sup> |
| <b>Temporal Cortex</b>                         |        |                        |
| Anterior Superior Temporal Gyrus (aSTG)        | -1.47  | 0.1441                 |
| Posterior Superior Temporal Gyrus (pSTG)*      | -6.32  | 2.04x10 <sup>-9</sup>  |
| Anterior Middle Temporal Gyrus (aMTG)          | -0.66  | 0.5117                 |
| Posterior Fusiform Gyrus (pFFG)**              | -9.77  | 2.69x10 <sup>-18</sup> |
| <b>Parietal Cortex</b>                         |        |                        |
| Superior Postcentral Gyrus (sPoCG)             | -3.00  | 0.0031                 |
| Middle Postcentral Gyrus (mPoCG)*              | -3.71  | 0.0003                 |
| Superior Parietal Lobule (SPL)                 | -0.23  | 0.8186                 |
| Angular Gyrus (AG)                             | -1.04  | 0.2990                 |
| Parietal Operculum (POP)*                      | -6.03  | 9.51x10 <sup>-9</sup>  |
| Paracentral Lobule (PCL)*                      | -11.32 | 1.09x10 <sup>-22</sup> |
| Precuneus (PCun)                               | -2.12  | 0.0355                 |
| <b>Occipital Cortex</b>                        |        |                        |
| Cuneus (Cun)*                                  | -13.11 | 7.10x10 <sup>-28</sup> |
| Lingual Gyrus (LG)*                            | -8.98  | 4.02x10 <sup>-16</sup> |
| Calcarine Sulcus (Calc)*                       | -7.38  | 5.90x10 <sup>-12</sup> |



### Basal Ganglia

|                        |       |                        |
|------------------------|-------|------------------------|
| Caudate Nucleus (CN)   | -1.54 | 0.1264                 |
| Thalamus (Th)*         | -8.36 | $1.77 \times 10^{-14}$ |
| Globus Pallidus (GP)*  | -8.57 | $4.89 \times 10^{-15}$ |
| Nucleus Accumbens (NA) | -0.75 | 0.4553                 |

### Cerebellum

|                                 |       |                        |
|---------------------------------|-------|------------------------|
| Cerebellum IX (CerIX)*          | -7.16 | $2.07 \times 10^{-11}$ |
| Cerebellum VIIIAB (CerVIIIAB)   | -2.23 | 0.0270                 |
| Cerebellum VI (CerVI)*          | -3.64 | 0.0004                 |
| Cerebellum V-Anterior B (CerVB) | -2.05 | 0.0419                 |
| Cerebellum V-Anterior A (CerVA) | -2.31 | 0.0223                 |
| Cerebellum II (CerII)*          | -6.39 | $1.44 \times 10^{-9s}$ |

789 **Key:** \* multiple comparisons correction at FWE  $p \leq 0.05$ .

790

791

792

### References

793

794 Ashburner J, Friston KJ. 2005. Unified segmentation. *Neuroimage*. 26:839–851.

795 Dahnke R, Gaser C. 2017. Voxel-based Preprocessing in CAT. *Organ Hum Brain Mapp*.

796 Dahnke R, Ziegler G, Gaser C. 2012. Local Adaptive Segmentation. *Hum Brain Mapp Conf*.

797 Manjon J V, Coupe P, Marti-Bonmati L, Collins DL, Robles M. 2010. Adaptive non-local means  
798 denoising of MR images with spatially varying noise levels. *J Magn Reson Imaging*.

799 31:192–203.

800 Rajapakse JC, Giedd JN, Rapoport JL. 1997. Statistical approach to segmentation of single-  
801 channel cerebral MR images. *IEEE Trans Med Imaging*. 16:176–186.

802 Tohka J, Zijdenbos A, Evans A. 2004. Fast and robust parameter estimation for statistical partial  
803 volume models in brain MRI. *Neuroimage*. 23:84–97.

804

805
